# Supplementary material
Source: publisher figshare collection journal article supplement (https://gsajournals.figshare.com/ndownloader/files/13687619)
Supplement: Supplementary file 1 [file 13687619]

## Sheet: 15s(9)
Position	8	177	430	449	475	577	586	728	730
yjm1078	A -> T	0	1 Ins	0	0	T -> A	1 Del	0	0
yjm1083	0	0	0	A -> T	0	0	1 Del	0	1 Del
yjm1129	0	0	0	0	0	0	0	1 Del	0
yjm1133	A -> T	0	1 Ins	0	4 Del	T -> A	1 Del	1 Del	0
yjm1190	A -> T	0	1 Ins	0	4 Del	T -> A	1 Del	1 Del	0
yjm1199	A -> T	0	1 Ins	0	4 Del	T -> A	1 Del	1 Del	0
yjm1202	A -> T	0	1 Ins	0	4 Del	T -> A	1 Del	1 Del	0
yjm1208	0	0	0	0	0	0	0	0	1 Del
yjm1242	0	T -> A	0	0	0	T -> A	1 Del	0	0
yjm1244	A -> T	0	1 Ins	0	0	0	0	1 Del	0
yjm1248	0	0	0	0	0	0	0	0	0
yjm1250	A -> T	0	0	0	0	0	1 Del	0	1 Del
yjm1252	0	T -> A	0	0	0	T -> A	1 Del	0	0
yjm1273	0	0	0	0	0	0	0	0	1 Del
yjm1304	0	0	0	A -> T	0	0	0	0	1 Del
yjm1307	0	0	0	0	0	0	0	0	0
yjm1311	0	0	0	A -> T	0	0	1 Del	0	1 Del
yjm1326	0	0	0	A -> T	0	0	0	0	1 Del
yjm1332	A -> T	0	1 Ins	0	4 Del	T -> A	1 Del	0	0
yjm1336	A -> T	0	1 Ins	0	0	T -> A	1 Del	0	0
yjm1338	A -> T	0	0	0	0	0	0	1 Del	0
yjm1341	A -> T	0	1 Ins	0	4 Del	T -> A	1 Del	0	0
yjm1342	0	0	1 Ins	0	0	T -> A	1 Del	0	1 Del
yjm1355	0	0	0	A -> T	0	0	0	0	1 Del
yjm1356	0	0	0	0	0	0	0	1 Del	0
yjm1381	0	0	0	A -> T	0	0	1 Del	0	1 Del
yjm1383	0	0	0	0	0	0	0	0	1 Del
yjm1385	0	0	0	0	0	0	1 Del	0	1 Del
yjm1386	0	0	0	A -> T	0	0	1 Del	0	1 Del
yjm1387	0	0	1 Ins	0	0	0	0	0	1 Del
yjm1388	A -> T	0	0	0	0	0	1 Del	0	1 Del
yjm1389	A -> T	0	0	0	0	0	1 Del	0	1 Del
yjm1399	0	0	0	0	0	0	0	0	1 Del
yjm1400	A -> T	0	0	A -> T	0	0	0	0	1 Del
yjm1401	0	0	0	0	0	0	0	0	1 Del
yjm1402	0	0	0	A -> T	0	0	0	0	1 Del
yjm1415	A -> T	0	1 Ins	0	4 Del	T -> A	1 Del	0	0
yjm1417	A -> T	0	1 Ins	0	0	T -> A	1 Del	0	0
yjm1418	0	0	0	A -> T	0	T -> A	1 Del	0	1 Del
yjm1419	0	0	1 Ins	A -> T	0	0	0	0	1 Del
yjm1433	0	0	0	0	0	0	0	1 Del	0
yjm1434	0	0	0	0	0	0	0	0	1 Del
yjm1439	0	0	0	0	0	0	0	0	0
yjm1443	0	0	0	A -> T	0	0	0	0	1 Del
yjm1444	0	0	0	A -> T	0	0	1 Del	0	1 Del
yjm1447	0	0	1 Ins	0	0	0	1 Del	0	1 Del
yjm1450	0	0	0	A -> T	0	0	0	0	1 Del
yjm1460	0	0	0	0	0	0	1 Del	0	1 Del
yjm1463	0	0	0	A -> T	0	0	1 Del	0	1 Del
yjm1477	0	T -> A	0	0	0	T -> A	1 Del	0	0
yjm1478	0	0	0	0	0	0	0	0	0
yjm1479	A -> T	0	0	A -> T	0	0	0	0	1 Del
yjm1526	0	0	0	0	0	0	0	1 Del	0
yjm1527	0	0	0	A -> T	0	0	0	0	1 Del
yjm1549	0	0	0	0	0	0	1 Del	0	1 Del
yjm1573	0	0	0	A -> T	0	0	0	0	1 Del
yjm1574	A -> T	T -> A	0	0	0	T -> A	1 Del	0	0
yjm1592	A -> T	0	0	0	0	0	1 Del	0	1 Del
yjm1615	0	0	0	0	0	0	0	0	1 Del
yjm189	A -> T	0	1 Ins	0	4 Del	T -> A	1 Del	1 Del	0
yjm193	0	0	0	0	0	0	1 Del	0	1 Del
yjm195	0	0	0	0	0	0	0	0	1 Del
yjm244	A -> T	0	0	0	0	0	0	1 Del	0
yjm248	0	T -> A	0	0	0	T -> A	1 Del	0	0
yjm270	A -> T	T -> A	0	0	0	T -> A	1 Del	0	0
yjm271	0	0	0	0	0	0	1 Del	0	1 Del
yjm320	0	0	0	A -> T	0	0	0	0	1 Del
yjm326	A -> T	0	1 Ins	0	4 Del	T -> A	1 Del	1 Del	0
yjm428	0	T -> A	0	0	0	T -> A	1 Del	0	0
yjm450	0	0	0	A -> T	0	0	0	0	1 Del
yjm451	0	0	0	0	0	0	0	0	1 Del
yjm453	A -> T	0	1 Ins	0	4 Del	T -> A	1 Del	1 Del	0
yjm456	0	0	0	A -> T	0	0	0	0	1 Del
yjm470	0	0	0	0	0	0	0	0	1 Del
yjm541	0	0	0	A -> T	0	0	0	0	1 Del
yjm554	0	0	0	A -> T	0	0	0	0	1 Del
yjm555	0	0	0	A -> T	0	0	0	0	1 Del
yjm627	0	0	0	0	0	0	0	0	0
yjm681	0	0	0	0	0	0	0	0	1 Del
yjm682	A -> T	0	1 Ins	0	4 Del	T -> A	1 Del	1 Del	0
yjm683	A -> T	0	1 Ins	0	4 Del	T -> A	1 Del	1 Del	0
yjm689	A -> T	0	0	0	0	0	0	0	1 Del
yjm693	0	0	0	0	0	0	0	1 Del	0
yjm969	A -> T	0	0	0	0	0	0	1 Del	0
yjm972	A -> T	0	0	0	0	0	0	1 Del	0
yjm975	A -> T	0	0	0	0	0	0	1 Del	0
yjm978	A -> T	0	0	0	0	0	0	1 Del	0
yjm981	A -> T	0	0	0	0	0	0	1 Del	0
yjm984	A -> T	0	0	0	0	0	0	1 Del	0
yjm987	A -> T	0	0	0	0	0	0	1 Del	0
yjm990	A -> T	0	0	0	0	0	0	1 Del	0
yjm993	A -> T	0	0	0	0	0	0	1 Del	0
yjm996	A -> T	0	0	0	0	0	0	1 Del	0
SK1	0	0	0	0	0	0	0	0	0
YJM789	0	0	0	A -> T	0	0	0	0	1 Del

## Sheet: 21s(35)
Position	69	177	192	197	260	404	543	763	1117	1160	1375	1426	1471	1497	1505	1786	2136	2224	2477	2494	2498	2511	2519	2522	2569	3860	3873	3895	4127	4333	4334	4335	4339	4344	4355
yjm1078	0	0	0	0	0	G -> A	0	T -> A	0	6 Ins	1 Ins	0	0	0	T -> A	0	0	T -> A	0	0	0	0	0	0	0	1143 Del	G -> A	C -> T	0	9 Del	0	0	1 Del	0	0
yjm1083	0	0	0	0	0	0	0	0	0	0	0	0	8 Del	A -> T	0	0	0	0	0	0	0	0	0	0	0	0	0	0	0	0	0	0	0	0	0
yjm1129	T -> A	A -> T	0	1 Ins	G -> T	G -> A	0	T -> A	0	6 Ins	1 Ins	0	0	0	T -> A	A -> T	0	T -> A	0	0	0	0	0	0	0	1143 Del	G -> A	C -> T	A -> T	9 Del	0	0	1 Del	0	0
yjm1133	0	0	0	0	0	0	0	0	0	0	0	0	8 Del	0	0	A -> T	0	0	0	0	0	0	0	0	0	0	0	0	0	9 Del	0	0	1 Del	0	0
yjm1190	0	0	1 Ins	0	0	0	0	0	0	0	0	0	8 Del	0	0	A -> T	0	T -> A	0	0	0	0	0	0	0	0	0	0	0	0	0	0	0	0	0
yjm1199	0	0	0	0	0	0	0	0	0	0	0	0	8 Del	0	0	A -> T	0	0	0	0	0	0	0	0	0	0	0	0	0	0	0	0	0	0	0
yjm1202	0	0	0	0	0	0	0	0	0	0	0	0	8 Del	0	0	A -> T	0	0	0	0	0	0	0	0	0	0	0	0	0	0	0	0	0	0	0
yjm1208	0	0	0	0	0	0	0	0	0	0	0	0	0	0	0	0	0	0	0	0	0	T -> A	0	0	0	0	0	0	0	0	0	0	0	0	0
yjm1242	T -> A	A -> T	0	1 Ins	G -> T	0	0	T -> A	0	6 Ins	1 Ins	0	0	0	T -> A	A -> T	0	T -> A	0	0	0	0	0	0	0	1143 Del	G -> A	C -> T	A -> T	9 Del	0	0	1 Del	0	0
yjm1244	0	0	0	0	0	0	0	T -> A	0	6 Ins	1 Ins	0	0	0	T -> A	A -> T	0	T -> A	0	0	0	0	0	0	0	1143 Del	G -> A	C -> T	A -> T	9 Del	0	0	1 Del	0	0
yjm1248	0	A -> T	0	0	0	0	A -> T	0	0	0	0	0	8 Del	0	0	0	3 Ins	T -> A	0	0	0	0	A -> C	C -> T	0	1143 Del	G -> A	C -> T	0	0	0	0	0	A -> T	0
yjm1250	T -> A	A -> T	0	1 Ins	G -> T	0	0	T -> A	0	6 Ins	1 Ins	0	0	0	T -> A	A -> T	0	0	0	0	0	0	A -> C	0	0	1143 Del	G -> A	C -> T	0	0	0	0	0	0	0
yjm1252	T -> A	A -> T	0	1 Ins	G -> T	G -> A	0	0	0	6 Ins	1 Ins	0	0	0	T -> A	0	0	T -> A	0	0	0	0	0	0	0	1143 Del	G -> A	C -> T	0	0	T -> A	A -> T	0	A -> T	T -> A
yjm1273	0	0	1 Ins	0	0	0	A -> T	0	0	0	0	1 Ins	8 Del	A -> T	0	0	0	0	0	0	0	0	A -> C	C -> T	0	1143 Del	G -> A	C -> T	0	0	0	0	0	0	0
yjm1304	0	0	0	0	0	0	0	0	0	0	0	0	8 Del	0	0	A -> T	0	T -> A	0	0	0	0	0	0	0	0	0	0	0	0	0	0	0	0	0
yjm1307	0	0	0	0	0	0	A -> T	0	G -> A	0	0	0	8 Del	0	0	A -> T	0	0	0	0	0	0	0	0	0	0	0	0	0	0	0	0	0	0	0
yjm1311	0	A -> T	0	0	0	0	A -> T	0	0	0	0	0	8 Del	A -> T	0	0	0	0	0	0	0	0	0	0	0	0	0	0	0	0	0	0	0	0	0
yjm1326	0	0	0	0	0	0	0	0	0	0	0	0	8 Del	0	0	A -> T	0	T -> A	T -> C	17 Del	C -> A	0	0	0	0	0	0	0	0	0	0	0	0	0	0
yjm1332	0	0	0	0	G -> T	0	0	T -> A	0	6 Ins	1 Ins	0	0	0	T -> A	A -> T	0	T -> A	0	0	0	0	0	0	0	0	0	0	A -> T	9 Del	0	0	1 Del	0	0
yjm1336	0	0	0	0	G -> T	0	0	T -> A	0	6 Ins	1 Ins	0	0	0	T -> A	A -> T	0	T -> A	0	0	0	0	0	0	0	1143 Del	G -> A	C -> T	0	9 Del	0	0	1 Del	0	0
yjm1338	T -> A	A -> T	0	1 Ins	G -> T	G -> A	0	T -> A	0	6 Ins	1 Ins	0	0	0	T -> A	A -> T	0	T -> A	0	0	0	0	0	0	0	1143 Del	G -> A	C -> T	0	9 Del	0	0	1 Del	0	0
yjm1341	T -> A	A -> T	0	1 Ins	G -> T	G -> A	0	T -> A	0	6 Ins	1 Ins	0	0	0	T -> A	A -> T	0	T -> A	0	0	0	0	0	0	0	1143 Del	G -> A	C -> T	0	9 Del	0	0	1 Del	0	0
yjm1342	0	A -> T	0	0	0	0	A -> T	0	0	0	0	0	8 Del	0	0	A -> T	0	0	0	0	0	0	A -> C	0	0	1143 Del	G -> A	C -> T	0	0	0	0	0	0	0
yjm1355	0	0	1 Ins	0	0	0	A -> T	0	0	0	0	0	8 Del	A -> T	0	A -> T	0	0	0	0	0	0	0	0	0	0	0	0	0	0	0	0	0	0	0
yjm1356	T -> A	A -> T	0	1 Ins	0	0	0	T -> A	0	6 Ins	0	0	8 Del	0	0	A -> T	0	T -> A	0	0	0	0	0	0	0	1143 Del	G -> A	C -> T	A -> T	9 Del	0	0	1 Del	0	0
yjm1381	0	0	0	0	0	0	0	0	0	0	0	0	8 Del	0	0	A -> T	0	0	0	0	0	0	A -> C	0	0	0	0	0	0	0	0	0	0	0	0
yjm1383	0	0	0	0	0	0	A -> T	0	0	0	0	0	8 Del	A -> T	0	A -> T	0	0	0	0	0	0	A -> C	0	0	0	0	0	0	9 Del	0	0	1 Del	0	0
yjm1385	0	0	0	0	0	0	0	0	0	0	0	0	8 Del	0	0	A -> T	0	0	0	0	0	0	A -> C	0	0	0	0	0	0	0	0	0	0	0	0
yjm1386	0	0	0	0	0	0	0	0	0	0	0	0	8 Del	0	0	A -> T	0	T -> A	0	0	0	0	A -> C	0	0	0	0	0	0	0	T -> A	A -> T	0	A -> T	T -> A
yjm1387	0	0	0	0	0	0	0	0	0	0	0	0	8 Del	0	0	A -> T	0	0	T -> C	17 Del	C -> A	0	0	0	A -> T	1143 Del	G -> A	C -> T	0	0	0	0	0	0	0
yjm1388	0	0	0	0	0	0	A -> T	0	G -> A	0	0	0	8 Del	A -> T	0	A -> T	0	0	T -> C	17 Del	C -> A	0	0	0	A -> T	1143 Del	G -> A	C -> T	0	0	0	0	0	0	0
yjm1389	0	0	0	0	0	0	A -> T	0	G -> A	0	0	0	8 Del	A -> T	T -> A	A -> T	0	0	T -> C	17 Del	C -> A	0	0	0	A -> T	1143 Del	G -> A	C -> T	0	0	0	0	0	0	0
yjm1399	0	0	0	0	G -> T	0	0	0	0	0	0	0	0	0	T -> A	0	0	T -> A	0	0	0	0	A -> C	C -> T	A -> T	1143 Del	G -> A	C -> T	0	0	0	0	0	0	0
yjm1400	0	A -> T	1 Ins	0	0	0	A -> T	0	0	0	0	1 Ins	8 Del	0	0	0	0	0	0	0	0	T -> A	0	0	A -> T	1143 Del	G -> A	C -> T	0	0	0	0	0	0	0
yjm1401	0	A -> T	0	0	0	0	A -> T	0	0	0	0	0	8 Del	A -> T	0	0	0	0	0	0	0	0	A -> C	0	0	0	0	0	0	0	0	0	0	0	0
yjm1402	0	A -> T	1 Ins	0	0	0	A -> T	0	0	0	0	0	8 Del	0	0	0	0	0	0	0	0	0	A -> C	C -> T	0	1143 Del	G -> A	C -> T	0	0	0	0	0	0	0
yjm1415	0	0	0	0	0	0	0	T -> A	0	6 Ins	1 Ins	0	0	0	T -> A	A -> T	0	T -> A	0	0	0	0	0	0	0	1143 Del	G -> A	C -> T	0	9 Del	0	0	1 Del	0	0
yjm1417	T -> A	A -> T	0	1 Ins	G -> T	0	0	T -> A	0	6 Ins	1 Ins	0	0	0	T -> A	A -> T	0	T -> A	0	0	0	0	0	0	0	1143 Del	G -> A	C -> T	0	9 Del	0	0	1 Del	0	0
yjm1418	0	A -> T	0	0	0	0	A -> T	0	0	0	0	0	8 Del	0	0	A -> T	0	T -> A	0	0	0	0	0	0	A -> T	1143 Del	G -> A	C -> T	0	0	0	0	0	0	0
yjm1419	0	0	0	0	0	0	A -> T	0	G -> A	0	0	1 Ins	8 Del	A -> T	0	0	0	0	0	0	0	0	A -> C	0	0	0	0	0	0	0	0	0	0	0	0
yjm1433	0	0	0	0	G -> T	0	0	T -> A	0	6 Ins	1 Ins	0	0	0	T -> A	A -> T	0	T -> A	0	0	0	0	0	0	0	1143 Del	G -> A	C -> T	A -> T	0	T -> A	A -> T	0	A -> T	T -> A
yjm1434	0	0	1 Ins	0	0	0	A -> T	0	0	0	0	1 Ins	8 Del	A -> T	0	0	0	0	0	0	0	0	A -> C	C -> T	0	1143 Del	G -> A	C -> T	0	0	0	0	0	0	0
yjm1439	0	A -> T	0	0	0	0	A -> T	0	0	0	0	0	8 Del	0	0	0	3 Ins	T -> A	0	0	0	0	A -> C	C -> T	0	1143 Del	G -> A	C -> T	0	0	0	0	0	A -> T	0
yjm1443	0	0	1 Ins	0	0	0	A -> T	0	0	0	0	0	8 Del	0	0	A -> T	0	0	T -> C	17 Del	C -> A	0	0	0	A -> T	1143 Del	G -> A	C -> T	0	0	0	0	0	0	0
yjm1444	0	A -> T	0	0	0	0	0	0	0	0	0	1 Ins	8 Del	0	0	0	0	T -> A	0	0	0	0	0	0	0	0	G -> A	C -> T	0	0	0	0	0	0	0
yjm1447	0	A -> T	0	0	0	0	A -> T	0	0	0	0	0	8 Del	0	0	0	0	T -> A	0	0	0	0	0	0	0	1143 Del	G -> A	C -> T	0	0	0	0	0	0	0
yjm1450	0	0	0	0	0	0	A -> T	0	0	0	0	0	8 Del	0	0	A -> T	0	0	0	0	0	0	0	0	A -> T	1143 Del	G -> A	C -> T	0	0	0	0	0	0	0
yjm1460	0	0	0	0	0	0	A -> T	0	0	0	0	0	8 Del	A -> T	T -> A	A -> T	0	0	0	0	0	0	A -> C	0	0	1143 Del	G -> A	C -> T	0	0	0	0	0	0	0
yjm1463	T -> A	A -> T	0	1 Ins	G -> T	G -> A	0	0	0	6 Ins	1 Ins	0	0	0	T -> A	A -> T	0	0	0	0	0	0	0	0	0	1143 Del	G -> A	C -> T	0	0	0	0	0	0	0
yjm1477	T -> A	A -> T	0	1 Ins	G -> T	0	0	T -> A	0	6 Ins	1 Ins	0	0	0	T -> A	A -> T	0	T -> A	0	0	0	0	0	0	0	1143 Del	G -> A	C -> T	A -> T	9 Del	0	0	1 Del	0	0
yjm1478	T -> A	A -> T	0	1 Ins	G -> T	0	0	T -> A	0	6 Ins	1 Ins	0	0	0	T -> A	A -> T	0	T -> A	0	0	0	0	0	0	0	1143 Del	G -> A	C -> T	0	0	T -> A	A -> T	0	A -> T	T -> A
yjm1479	0	A -> T	1 Ins	0	0	0	A -> T	0	0	0	0	1 Ins	8 Del	0	0	0	0	0	0	0	0	T -> A	0	0	A -> T	1143 Del	G -> A	C -> T	0	0	0	0	0	0	0
yjm1526	T -> A	A -> T	0	1 Ins	G -> T	G -> A	0	T -> A	0	6 Ins	1 Ins	0	0	0	T -> A	A -> T	0	T -> A	0	0	0	0	0	0	0	1143 Del	G -> A	C -> T	A -> T	9 Del	0	0	1 Del	0	0
yjm1527	0	A -> T	0	0	0	0	0	0	0	0	0	1 Ins	8 Del	0	0	0	0	T -> A	0	0	0	0	A -> C	0	0	1143 Del	G -> A	C -> T	0	0	0	0	0	0	0
yjm1549	0	0	0	0	0	0	A -> T	0	0	0	0	0	8 Del	A -> T	0	A -> T	0	0	0	0	0	0	A -> C	0	0	1143 Del	G -> A	C -> T	0	0	0	0	0	0	0
yjm1573	0	A -> T	1 Ins	0	0	0	A -> T	0	0	0	0	0	8 Del	0	0	0	0	0	0	0	0	0	A -> C	C -> T	0	1143 Del	G -> A	C -> T	0	0	0	0	0	0	0
yjm1574	0	0	0	0	0	0	0	0	0	0	0	0	8 Del	0	0	A -> T	0	0	0	0	0	0	0	0	0	0	0	0	0	0	0	0	0	0	0
yjm1592	0	0	0	0	0	0	A -> T	0	G -> A	0	0	0	8 Del	A -> T	T -> A	A -> T	0	0	T -> C	17 Del	C -> A	0	0	0	A -> T	1143 Del	G -> A	C -> T	0	0	0	0	0	0	0
yjm1615	0	0	0	0	0	0	0	0	0	0	0	0	0	0	0	0	0	0	0	0	0	T -> A	0	0	0	0	0	0	0	0	0	0	0	0	0
yjm189	0	0	0	0	0	0	0	T -> A	0	6 Ins	1 Ins	0	0	0	T -> A	A -> T	0	T -> A	0	0	0	0	0	0	0	1143 Del	G -> A	C -> T	A -> T	9 Del	0	0	1 Del	0	0
yjm193	T -> A	A -> T	0	1 Ins	G -> T	0	0	0	0	6 Ins	1 Ins	0	0	0	T -> A	A -> T	0	T -> A	0	0	0	0	0	0	0	0	0	0	0	0	0	0	0	0	0
yjm195	0	A -> T	1 Ins	0	0	0	A -> T	0	0	0	0	0	8 Del	A -> T	0	0	3 Ins	T -> A	0	0	0	0	0	0	A -> T	1143 Del	G -> A	C -> T	0	0	0	0	0	0	0
yjm244	T -> A	A -> T	0	1 Ins	G -> T	G -> A	0	T -> A	0	6 Ins	1 Ins	0	0	0	T -> A	A -> T	0	T -> A	0	0	0	0	0	0	0	1143 Del	G -> A	C -> T	A -> T	9 Del	0	0	1 Del	0	0
yjm248	T -> A	A -> T	0	1 Ins	G -> T	G -> A	0	T -> A	0	6 Ins	1 Ins	0	0	0	T -> A	A -> T	0	T -> A	0	0	0	0	0	0	0	1143 Del	G -> A	C -> T	0	0	0	0	0	0	0
yjm270	T -> A	A -> T	0	1 Ins	G -> T	G -> A	0	0	0	6 Ins	1 Ins	0	0	0	T -> A	A -> T	0	T -> A	0	0	0	0	0	0	0	1143 Del	G -> A	C -> T	0	0	0	0	0	0	0
yjm271	T -> A	A -> T	0	1 Ins	G -> T	0	0	0	0	6 Ins	1 Ins	0	0	0	T -> A	A -> T	0	T -> A	0	0	0	0	0	0	0	0	0	0	0	0	0	0	0	0	0
yjm320	0	0	0	0	0	0	0	0	0	0	0	0	8 Del	0	0	A -> T	0	T -> A	0	0	0	0	0	0	0	0	0	0	0	9 Del	0	0	1 Del	0	0
yjm326	0	0	0	0	0	0	0	0	0	0	0	0	8 Del	0	0	A -> T	0	T -> A	0	0	0	0	0	0	0	0	0	0	0	9 Del	0	0	1 Del	0	0
yjm428	0	0	0	0	0	0	0	0	0	0	0	0	8 Del	0	0	A -> T	0	T -> A	0	0	0	0	0	0	0	0	0	0	0	9 Del	0	0	1 Del	0	0
yjm450	0	0	0	0	0	0	0	0	0	0	0	0	8 Del	0	0	A -> T	0	T -> A	0	0	0	0	0	0	0	0	0	0	0	9 Del	0	0	1 Del	0	0
yjm451	0	0	0	0	0	0	0	0	0	0	0	0	0	0	0	0	0	T -> A	0	0	0	0	0	0	0	0	0	0	0	0	0	0	0	0	0
yjm453	T -> A	A -> T	0	1 Ins	0	0	0	T -> A	0	6 Ins	1 Ins	0	0	0	T -> A	A -> T	0	T -> A	0	0	0	0	0	0	0	0	0	0	A -> T	9 Del	0	0	1 Del	0	0
yjm456	0	0	1 Ins	0	0	0	A -> T	0	0	0	0	0	8 Del	0	0	A -> T	0	0	0	0	0	0	0	0	0	0	0	0	0	9 Del	0	0	1 Del	0	0
yjm470	0	0	0	0	0	0	A -> T	0	0	0	0	1 Ins	8 Del	0	0	A -> T	3 Ins	T -> A	0	0	0	0	0	0	A -> T	1143 Del	G -> A	C -> T	0	0	0	0	0	0	0
yjm541	0	0	0	0	0	0	0	0	0	0	0	0	8 Del	0	0	A -> T	0	T -> A	0	0	0	0	0	0	0	0	0	0	0	9 Del	0	0	1 Del	0	0
yjm554	0	0	0	0	0	0	0	0	0	0	0	0	8 Del	0	0	A -> T	0	T -> A	0	0	0	0	0	0	0	0	0	0	0	9 Del	0	0	1 Del	0	0
yjm555	0	0	1 Ins	0	0	0	A -> T	0	0	0	0	0	8 Del	0	0	A -> T	0	T -> A	T -> C	17 Del	C -> A	0	0	0	A -> T	0	G -> A	C -> T	0	0	0	0	0	0	0
yjm627	0	A -> T	0	0	0	0	A -> T	0	0	0	0	0	8 Del	0	0	0	3 Ins	T -> A	0	0	0	0	A -> C	C -> T	0	1143 Del	G -> A	C -> T	0	0	0	0	0	A -> T	0
yjm681	0	A -> T	0	0	0	0	A -> T	0	0	0	0	0	8 Del	A -> T	0	0	0	0	0	0	0	0	0	0	0	0	G -> A	C -> T	0	0	0	0	0	0	0
yjm682	0	0	0	0	0	0	0	0	0	0	0	0	8 Del	0	0	A -> T	0	T -> A	0	0	0	0	0	0	0	0	0	0	0	9 Del	0	0	1 Del	0	0
yjm683	0	0	0	0	0	0	0	0	0	0	0	0	8 Del	0	0	A -> T	0	T -> A	0	0	0	0	0	0	0	0	0	0	0	9 Del	0	0	1 Del	0	0
yjm689	0	0	0	0	0	0	0	0	0	0	0	0	8 Del	0	0	A -> T	0	T -> A	T -> C	17 Del	C -> A	0	0	0	A -> T	0	G -> A	C -> T	0	0	0	0	0	0	0
yjm693	0	0	0	0	0	0	0	T -> A	0	6 Ins	1 Ins	0	0	0	T -> A	0	0	T -> A	0	0	0	0	0	0	0	0	0	0	0	0	T -> A	A -> T	0	A -> T	T -> A
yjm969	T -> A	A -> T	0	1 Ins	G -> T	G -> A	0	T -> A	0	6 Ins	1 Ins	0	0	0	T -> A	A -> T	0	T -> A	0	0	0	0	0	0	0	1143 Del	G -> A	C -> T	0	9 Del	0	0	1 Del	0	0
yjm972	T -> A	A -> T	0	1 Ins	G -> T	G -> A	0	T -> A	0	6 Ins	1 Ins	0	0	0	T -> A	A -> T	0	T -> A	0	0	0	0	0	0	0	1143 Del	G -> A	C -> T	0	9 Del	0	0	1 Del	0	0
yjm975	T -> A	A -> T	0	1 Ins	G -> T	G -> A	0	T -> A	0	6 Ins	1 Ins	0	0	0	T -> A	A -> T	0	T -> A	0	0	0	0	0	0	0	1143 Del	G -> A	C -> T	0	9 Del	0	0	1 Del	0	0
yjm978	T -> A	A -> T	0	1 Ins	G -> T	G -> A	0	T -> A	0	6 Ins	1 Ins	0	0	0	T -> A	A -> T	0	T -> A	0	0	0	0	0	0	0	1143 Del	G -> A	C -> T	0	9 Del	0	0	1 Del	0	0
yjm981	T -> A	A -> T	0	1 Ins	G -> T	G -> A	0	T -> A	0	6 Ins	1 Ins	0	0	0	T -> A	A -> T	0	T -> A	0	0	0	0	0	0	0	1143 Del	G -> A	C -> T	0	9 Del	0	0	1 Del	0	0
yjm984	T -> A	A -> T	0	1 Ins	G -> T	G -> A	0	T -> A	0	6 Ins	1 Ins	0	0	0	T -> A	A -> T	0	T -> A	0	0	0	0	0	0	0	1143 Del	G -> A	C -> T	0	9 Del	0	0	1 Del	0	0
yjm987	T -> A	A -> T	0	1 Ins	G -> T	G -> A	0	T -> A	0	6 Ins	1 Ins	0	0	0	T -> A	A -> T	0	T -> A	0	0	0	0	0	0	0	1143 Del	G -> A	C -> T	0	9 Del	0	0	1 Del	0	0
yjm990	T -> A	A -> T	0	1 Ins	G -> T	G -> A	0	T -> A	0	6 Ins	1 Ins	0	0	0	T -> A	A -> T	0	T -> A	0	0	0	0	0	0	0	1143 Del	G -> A	C -> T	0	9 Del	0	0	1 Del	0	0
yjm993	T -> A	A -> T	0	1 Ins	G -> T	G -> A	0	T -> A	0	6 Ins	1 Ins	0	0	0	T -> A	A -> T	0	T -> A	0	0	0	0	0	0	0	1143 Del	G -> A	C -> T	0	9 Del	0	0	1 Del	0	0
yjm996	T -> A	A -> T	0	1 Ins	G -> T	G -> A	0	T -> A	0	6 Ins	1 Ins	0	0	0	T -> A	A -> T	0	T -> A	0	0	0	0	0	0	0	1143 Del	G -> A	C -> T	0	9 Del	0	0	1 Del	0	0
SK1	0	A -> T	0	0	0	0	A -> T	0	0	0	0	0	0	0	0	0	0	0	0	0	0	0	0	0	0	0	0	0	0	0	0	0	0	A -> T	0
YJM789	0	0	1 Ins	0	0	0	0	0	0	0	0	0	8 Del	0	0	A -> T	0	0	0	0	0	T -> A	0	0	0	0	0	0	0	0	0	0	0	0	0

## Sheet: atp6(22)
Strain	345	351	529	531	543	605	648	678	684	693	714	717	720	721	722	732	733	734	738	753	763	766
yjm1078	T->C	0	0	0	0	0	0	0	C->T	G->T(N)	C->T	T->C	G->A	G->T(N)	G->C(N)	G->A	G->C(N)	C->T(N)	T->C	T->C	G->A(N)	G->T(N)
yjm1083	0	C->T	T->A(N)	C->T(N)	0	0	0	0	C->T	G->T(N)	C->T	T->C	G->A	G->T(N)	G->C(N)	G->A	G->C(N)	C->T(N)	T->C	T->C	G->A(N)	G->T(N)
yjm1129	T->C	0	0	0	0	0	0	0	C->T	G->T(N)	C->T	T->C	G->A	G->T(N)	G->C(N)	G->A	G->C(N)	C->T(N)	T->C	0	0	0
yjm1133	0	0	T->A(N)	C->T(N)	0	C->G(N)	0	C->T	C->T	G->T(N)	C->T	T->C	G->A	G->T(N)	G->C(N)	G->A	G->C(N)	C->T(N)	T->C	T->C	G->A(N)	G->T(N)
yjm1190	0	0	T->A(N)	C->T(N)	0	C->G(N)	0	C->T	C->T	G->T(N)	C->T	T->C	G->A	G->T(N)	G->C(N)	G->A	G->C(N)	C->T(N)	T->C	T->C	G->A(N)	G->T(N)
yjm1199	0	0	T->A(N)	C->T(N)	0	C->G(N)	0	C->T	C->T	G->T(N)	C->T	T->C	G->A	G->T(N)	G->C(N)	G->A	G->C(N)	C->T(N)	T->C	T->C	G->A(N)	G->T(N)
yjm1202	0	0	T->A(N)	C->T(N)	0	C->G(N)	0	C->T	C->T	G->T(N)	C->T	T->C	G->A	G->T(N)	G->C(N)	G->A	G->C(N)	C->T(N)	T->C	T->C	G->A(N)	G->T(N)
yjm1208	0	C->T	T->A(N)	C->T(N)	0	0	0	0	C->T	G->T(N)	C->T	T->C	G->A	G->T(N)	G->C(N)	G->A	G->C(N)	C->T(N)	T->C	T->C	G->A(N)	G->T(N)
yjm1242	T->C	0	0	0	0	0	0	C->T	C->T	G->T(N)	C->T	T->C	G->A	G->T(N)	G->C(N)	G->A	G->C(N)	C->T(N)	T->C	T->C	G->A(N)	G->T(N)
yjm1244	T->C	0	0	0	0	0	0	0	C->T	G->T(N)	C->T	T->C	G->A	G->T(N)	G->C(N)	G->A	G->C(N)	C->T(N)	T->C	T->C	G->A(N)	G->T(N)
yjm1248	0	0	0	0	0	0	0	0	C->T	G->T(N)	C->T	T->C	G->A	G->T(N)	G->C(N)	G->A	G->C(N)	C->T(N)	T->C	0	0	0
yjm1250	T->C	0	0	0	0	0	0	C->T	C->T	G->T(N)	C->T	T->C	G->A	G->T(N)	G->C(N)	G->A	G->C(N)	C->T(N)	T->C	T->C	G->A(N)	G->T(N)
yjm1252	T->C	0	0	0	0	0	0	0	C->T	G->T(N)	C->T	T->C	G->A	G->T(N)	G->C(N)	G->A	G->C(N)	C->T(N)	T->C	T->C	G->A(N)	G->T(N)
yjm1273	0	C->T	T->A(N)	C->T(N)	0	0	0	0	C->T	G->T(N)	C->T	T->C	G->A	G->T(N)	G->C(N)	G->A	G->C(N)	C->T(N)	T->C	T->C	G->A(N)	G->T(N)
yjm1304	0	0	T->A(N)	C->T(N)	0	0	0	0	C->T	G->T(N)	C->T	T->C	G->A	G->T(N)	G->C(N)	G->A	G->C(N)	C->T(N)	T->C	T->C	G->A(N)	G->T(N)
yjm1307	0	0	0	0	0	0	0	0	0	0	0	0	0	0	0	0	0	0	0	0	0	0
yjm1311	0	0	T->A(N)	C->T(N)	0	C->G(N)	0	C->T	C->T	G->T(N)	C->T	T->C	G->A	G->T(N)	G->C(N)	G->A	G->C(N)	C->T(N)	T->C	T->C	G->A(N)	G->T(N)
yjm1326	T->C	0	0	0	0	0	0	C->T	C->T	G->T(N)	C->T	T->C	G->A	G->T(N)	G->C(N)	G->A	G->C(N)	C->T(N)	T->C	T->C	G->A(N)	G->T(N)
yjm1332	0	0	0	0	0	0	0	C->T	C->T	G->T(N)	C->T	T->C	G->A	G->T(N)	G->C(N)	G->A	G->C(N)	C->T(N)	T->C	T->C	G->A(N)	G->T(N)
yjm1336	0	0	0	0	0	0	0	C->T	C->T	G->T(N)	C->T	T->C	G->A	G->T(N)	G->C(N)	G->A	G->C(N)	C->T(N)	T->C	T->C	G->A(N)	G->T(N)
yjm1338	T->C	0	0	0	0	0	0	C->T	C->T	G->T(N)	C->T	T->C	G->A	G->T(N)	G->C(N)	G->A	G->C(N)	C->T(N)	T->C	T->C	G->A(N)	G->T(N)
yjm1341	T->C	0	0	0	0	0	0	C->T	C->T	G->T(N)	C->T	T->C	G->A	G->T(N)	G->C(N)	G->A	G->C(N)	C->T(N)	T->C	T->C	G->A(N)	G->T(N)
yjm1342	0	0	0	0	T->C	0	0	0	C->T	G->T(N)	C->T	T->C	G->A	G->T(N)	G->C(N)	G->A	G->C(N)	C->T(N)	T->C	T->C	G->A(N)	G->T(N)
yjm1355	T->C	0	0	0	0	0	0	C->T	C->T	G->T(N)	C->T	T->C	G->A	G->T(N)	G->C(N)	G->A	G->C(N)	C->T(N)	T->C	T->C	G->A(N)	G->T(N)
yjm1356	T->C	0	0	0	0	0	0	C->T	C->T	G->T(N)	C->T	T->C	G->A	G->T(N)	G->C(N)	G->A	G->C(N)	C->T(N)	T->C	T->C	G->A(N)	G->T(N)
yjm1381	0	C->T	T->A(N)	C->T(N)	0	C->G(N)	A->C(N)	0	0	0	0	0	0	0	0	0	0	0	0	0	0	0
yjm1383	0	0	T->A(N)	C->T(N)	0	C->G(N)	0	C->T	C->T	G->T(N)	C->T	T->C	G->A	G->T(N)	G->C(N)	G->A	G->C(N)	C->T(N)	T->C	T->C	G->A(N)	G->T(N)
yjm1385	0	0	T->A(N)	C->T(N)	0	C->G(N)	0	C->T	C->T	G->T(N)	C->T	T->C	G->A	G->T(N)	G->C(N)	G->A	G->C(N)	C->T(N)	T->C	T->C	G->A(N)	G->T(N)
yjm1386	T->C	0	0	0	0	0	0	0	C->T	G->T(N)	C->T	T->C	G->A	G->T(N)	G->C(N)	G->A	G->C(N)	C->T(N)	T->C	0	0	0
yjm1387	0	C->T	T->A(N)	C->T(N)	0	0	0	0	C->T	G->T(N)	C->T	T->C	G->A	G->T(N)	G->C(N)	G->A	G->C(N)	C->T(N)	T->C	T->C	G->A(N)	G->T(N)
yjm1388	0	0	T->A(N)	C->T(N)	0	C->G(N)	A->C(N)	0	0	0	0	0	0	0	0	0	0	0	0	0	0	0
yjm1389	0	0	T->A(N)	C->T(N)	0	C->G(N)	A->C(N)	0	0	0	0	0	0	0	0	0	0	0	0	0	0	0
yjm1399	0	C->T	T->A(N)	C->T(N)	0	0	0	C->T	C->T	G->T(N)	C->T	T->C	G->A	G->T(N)	G->C(N)	G->A	G->C(N)	C->T(N)	T->C	T->C	G->A(N)	G->T(N)
yjm1400	0	0	0	0	0	0	0	0	C->T	G->T(N)	C->T	T->C	G->A	G->T(N)	G->C(N)	G->A	G->C(N)	C->T(N)	T->C	T->C	G->A(N)	G->T(N)
yjm1401	0	0	0	0	T->C	C->G(N)	0	0	C->T	G->T(N)	C->T	T->C	G->A	0	G->C(N)	G->A	G->C(N)	C->T(N)	T->C	0	0	0
yjm1402	0	C->T	T->A(N)	C->T(N)	0	0	0	0	C->T	G->T(N)	C->T	T->C	G->A	G->T(N)	G->C(N)	G->A	G->C(N)	C->T(N)	T->C	T->C	G->A(N)	G->T(N)
yjm1415	T->C	0	0	0	0	0	0	0	C->T	G->T(N)	C->T	T->C	G->A	G->T(N)	G->C(N)	G->A	G->C(N)	C->T(N)	T->C	0	0	0
yjm1417	T->C	0	0	0	0	0	0	C->T	C->T	G->T(N)	C->T	T->C	G->A	G->T(N)	G->C(N)	G->A	G->C(N)	C->T(N)	T->C	T->C	G->A(N)	G->T(N)
yjm1418	0	0	T->A(N)	C->T(N)	0	C->G(N)	A->C(N)	0	0	0	0	0	0	0	0	0	0	0	0	0	0	0
yjm1419	0	0	T->A(N)	C->T(N)	0	C->G(N)	A->C(N)	0	0	0	0	0	0	0	0	0	0	0	0	0	0	0
yjm1433	T->C	C->T	0	0	0	0	0	C->T	C->T	G->T(N)	C->T	T->C	G->A	G->T(N)	G->C(N)	G->A	G->C(N)	C->T(N)	T->C	T->C	G->A(N)	G->T(N)
yjm1434	0	C->T	T->A(N)	C->T(N)	0	0	0	0	C->T	G->T(N)	C->T	T->C	G->A	G->T(N)	G->C(N)	G->A	G->C(N)	C->T(N)	T->C	T->C	G->A(N)	G->T(N)
yjm1439	0	0	0	0	0	0	0	0	C->T	G->T(N)	C->T	T->C	G->A	G->T(N)	G->C(N)	G->A	G->C(N)	C->T(N)	T->C	0	0	0
yjm1443	0	0	T->A(N)	C->T(N)	0	0	0	0	C->T	G->T(N)	C->T	T->C	G->A	G->T(N)	G->C(N)	G->A	G->C(N)	C->T(N)	T->C	T->C	G->A(N)	G->T(N)
yjm1444	0	0	T->A(N)	C->T(N)	0	0	0	0	C->T	G->T(N)	C->T	T->C	G->A	G->T(N)	G->C(N)	G->A	G->C(N)	C->T(N)	T->C	T->C	G->A(N)	G->T(N)
yjm1447	0	0	T->A(N)	C->T(N)	0	C->G(N)	A->C(N)	0	0	0	0	0	0	0	0	0	0	0	0	0	0	0
yjm1450	0	0	0	0	T->C	C->G(N)	0	0	C->T	G->T(N)	C->T	T->C	G->A	0	G->C(N)	G->A	G->C(N)	C->T(N)	T->C	0	0	0
yjm1460	0	0	0	0	T->C	C->G(N)	0	0	C->T	G->T(N)	C->T	T->C	G->A	0	G->C(N)	G->A	G->C(N)	C->T(N)	T->C	0	0	0
yjm1463	T->C	C->T	0	0	0	0	0	0	C->T	G->T(N)	C->T	T->C	G->A	G->T(N)	G->C(N)	G->A	G->C(N)	C->T(N)	T->C	T->C	G->A(N)	G->T(N)
yjm1477	T->C	0	0	0	0	0	0	C->T	C->T	G->T(N)	C->T	T->C	G->A	G->T(N)	G->C(N)	G->A	G->C(N)	C->T(N)	T->C	T->C	G->A(N)	G->T(N)
yjm1478	0	0	0	0	0	0	0	0	C->T	G->T(N)	C->T	T->C	G->A	G->T(N)	G->C(N)	G->A	G->C(N)	C->T(N)	T->C	T->C	G->A(N)	G->T(N)
yjm1479	0	0	0	0	0	0	0	0	C->T	G->T(N)	C->T	T->C	G->A	G->T(N)	G->C(N)	G->A	G->C(N)	C->T(N)	T->C	T->C	G->A(N)	G->T(N)
yjm1526	T->C	0	0	0	0	0	0	0	C->T	G->T(N)	C->T	T->C	G->A	G->T(N)	G->C(N)	G->A	G->C(N)	C->T(N)	T->C	0	0	0
yjm1527	0	0	T->A(N)	C->T(N)	0	0	0	0	C->T	G->T(N)	C->T	T->C	G->A	G->T(N)	G->C(N)	G->A	G->C(N)	C->T(N)	T->C	T->C	G->A(N)	G->T(N)
yjm1549	0	C->T	T->A(N)	C->T(N)	0	C->G(N)	A->C(N)	0	0	0	0	0	0	0	0	0	0	0	0	0	0	0
yjm1573	0	C->T	T->A(N)	C->T(N)	0	0	0	0	C->T	G->T(N)	C->T	T->C	G->A	G->T(N)	G->C(N)	G->A	G->C(N)	C->T(N)	T->C	T->C	G->A(N)	G->T(N)
yjm1574	T->C	0	0	0	0	0	0	0	C->T	G->T(N)	C->T	T->C	G->A	G->T(N)	G->C(N)	G->A	G->C(N)	C->T(N)	T->C	0	0	0
yjm1592	0	0	T->A(N)	C->T(N)	0	C->G(N)	A->C(N)	0	0	0	0	0	0	0	0	0	0	0	0	0	0	0
yjm1615	0	C->T	T->A(N)	C->T(N)	0	0	0	0	C->T	G->T(N)	C->T	T->C	G->A	G->T(N)	G->C(N)	G->A	G->C(N)	C->T(N)	T->C	T->C	G->A(N)	G->T(N)
yjm189	T->C	0	0	0	0	0	0	C->T	C->T	G->T(N)	C->T	T->C	G->A	G->T(N)	G->C(N)	G->A	G->C(N)	C->T(N)	T->C	T->C	G->A(N)	G->T(N)
yjm193	0	0	0	0	0	0	0	0	C->T	G->T(N)	C->T	T->C	G->A	G->T(N)	G->C(N)	G->A	G->C(N)	C->T(N)	T->C	T->C	G->A(N)	G->T(N)
yjm195	0	C->T	T->A(N)	C->T(N)	0	C->G(N)	A->C(N)	0	0	0	0	0	0	0	0	0	0	0	0	0	0	0
yjm244	0	0	0	0	0	0	0	C->T	C->T	G->T(N)	C->T	T->C	G->A	G->T(N)	G->C(N)	G->A	G->C(N)	C->T(N)	T->C	T->C	G->A(N)	G->T(N)
yjm248	T->C	0	0	0	0	0	0	0	C->T	G->T(N)	C->T	T->C	G->A	G->T(N)	G->C(N)	G->A	G->C(N)	C->T(N)	T->C	T->C	G->A(N)	G->T(N)
yjm270	0	0	0	0	0	0	0	0	C->T	G->T(N)	C->T	T->C	G->A	0	G->C(N)	G->A	G->C(N)	C->T(N)	T->C	0	0	0
yjm271	0	0	0	0	0	0	0	0	C->T	G->T(N)	C->T	T->C	G->A	G->T(N)	G->C(N)	G->A	G->C(N)	C->T(N)	T->C	T->C	G->A(N)	G->T(N)
yjm320	0	0	T->A(N)	C->T(N)	0	C->G(N)	0	C->T	C->T	G->T(N)	C->T	T->C	G->A	G->T(N)	G->C(N)	G->A	G->C(N)	C->T(N)	T->C	T->C	G->A(N)	G->T(N)
yjm326	0	0	T->A(N)	C->T(N)	0	C->G(N)	0	C->T	C->T	G->T(N)	C->T	T->C	G->A	G->T(N)	G->C(N)	G->A	G->C(N)	C->T(N)	T->C	T->C	G->A(N)	G->T(N)
yjm428	T->C	0	0	0	0	0	0	0	C->T	G->T(N)	C->T	T->C	G->A	G->T(N)	G->C(N)	G->A	G->C(N)	C->T(N)	T->C	T->C	G->A(N)	G->T(N)
yjm450	0	0	T->A(N)	C->T(N)	0	C->G(N)	0	C->T	C->T	G->T(N)	C->T	T->C	G->A	G->T(N)	G->C(N)	G->A	G->C(N)	C->T(N)	T->C	T->C	G->A(N)	G->T(N)
yjm451	0	C->T	T->A(N)	C->T(N)	0	0	0	0	C->T	G->T(N)	C->T	T->C	G->A	G->T(N)	G->C(N)	G->A	G->C(N)	C->T(N)	T->C	T->C	G->A(N)	G->T(N)
yjm453	0	0	0	0	0	0	0	C->T	C->T	G->T(N)	C->T	T->C	G->A	G->T(N)	G->C(N)	G->A	G->C(N)	C->T(N)	T->C	T->C	G->A(N)	G->T(N)
yjm456	0	0	T->A(N)	C->T(N)	0	0	0	0	C->T	G->T(N)	C->T	T->C	G->A	G->T(N)	G->C(N)	G->A	G->C(N)	C->T(N)	T->C	T->C	G->A(N)	G->T(N)
yjm470	0	0	0	0	T->C	C->G(N)	0	0	C->T	G->T(N)	C->T	T->C	G->A	0	G->C(N)	G->A	G->C(N)	C->T(N)	T->C	0	0	0
yjm541	0	0	T->A(N)	C->T(N)	0	C->G(N)	0	C->T	C->T	G->T(N)	C->T	T->C	G->A	G->T(N)	G->C(N)	G->A	G->C(N)	C->T(N)	T->C	T->C	G->A(N)	G->T(N)
yjm554	0	0	T->A(N)	C->T(N)	0	C->G(N)	0	C->T	C->T	G->T(N)	C->T	T->C	G->A	G->T(N)	G->C(N)	G->A	G->C(N)	C->T(N)	T->C	T->C	G->A(N)	G->T(N)
yjm555	0	0	T->A(N)	C->T(N)	0	C->G(N)	0	C->T	C->T	G->T(N)	C->T	T->C	G->A	G->T(N)	G->C(N)	G->A	G->C(N)	C->T(N)	T->C	T->C	G->A(N)	G->T(N)
yjm627	0	0	0	0	0	0	0	C->T	C->T	G->T(N)	C->T	T->C	G->A	G->T(N)	G->C(N)	G->A	G->C(N)	C->T(N)	T->C	T->C	G->A(N)	G->T(N)
yjm681	0	0	T->A(N)	C->T(N)	0	C->G(N)	0	C->T	C->T	G->T(N)	C->T	T->C	G->A	G->T(N)	G->C(N)	G->A	G->C(N)	C->T(N)	T->C	T->C	G->A(N)	G->T(N)
yjm682	0	0	T->A(N)	C->T(N)	0	C->G(N)	0	C->T	C->T	G->T(N)	C->T	T->C	G->A	G->T(N)	G->C(N)	G->A	G->C(N)	C->T(N)	T->C	T->C	G->A(N)	G->T(N)
yjm683	0	0	T->A(N)	C->T(N)	0	C->G(N)	0	C->T	C->T	G->T(N)	C->T	T->C	G->A	G->T(N)	G->C(N)	G->A	G->C(N)	C->T(N)	T->C	T->C	G->A(N)	G->T(N)
yjm689	0	0	T->A(N)	C->T(N)	0	C->G(N)	0	C->T	C->T	G->T(N)	C->T	T->C	G->A	G->T(N)	G->C(N)	G->A	G->C(N)	C->T(N)	T->C	T->C	G->A(N)	G->T(N)
yjm693	0	0	T->A(N)	C->T(N)	0	0	0	C->T	C->T	G->T(N)	C->T	T->C	G->A	G->T(N)	G->C(N)	G->A	G->C(N)	C->T(N)	T->C	T->C	G->A(N)	G->T(N)
yjm969	T->C	0	0	0	0	0	0	0	C->T	G->T(N)	C->T	T->C	G->A	G->T(N)	G->C(N)	G->A	G->C(N)	C->T(N)	T->C	0	0	0
yjm972	T->C	0	0	0	0	0	0	0	C->T	G->T(N)	C->T	T->C	G->A	G->T(N)	G->C(N)	G->A	G->C(N)	C->T(N)	T->C	0	0	0
yjm975	T->C	0	0	0	0	0	0	0	C->T	G->T(N)	C->T	T->C	G->A	G->T(N)	G->C(N)	G->A	G->C(N)	C->T(N)	T->C	0	0	0
yjm978	T->C	0	0	0	0	0	0	0	C->T	G->T(N)	C->T	T->C	G->A	G->T(N)	G->C(N)	G->A	G->C(N)	C->T(N)	T->C	0	0	0
yjm981	T->C	0	0	0	0	0	0	0	C->T	G->T(N)	C->T	T->C	G->A	G->T(N)	G->C(N)	G->A	G->C(N)	C->T(N)	T->C	0	0	0
yjm984	T->C	0	0	0	0	0	0	0	C->T	G->T(N)	C->T	T->C	G->A	G->T(N)	G->C(N)	G->A	G->C(N)	C->T(N)	T->C	0	0	0
yjm987	T->C	0	0	0	0	0	0	0	C->T	G->T(N)	C->T	T->C	G->A	G->T(N)	G->C(N)	G->A	G->C(N)	C->T(N)	T->C	0	0	0
yjm990	T->C	0	0	0	0	0	0	0	C->T	G->T(N)	C->T	T->C	G->A	G->T(N)	G->C(N)	G->A	G->C(N)	C->T(N)	T->C	0	0	0
yjm993	T->C	0	0	0	0	0	0	0	C->T	G->T(N)	C->T	T->C	G->A	G->T(N)	G->C(N)	G->A	G->C(N)	C->T(N)	T->C	0	0	0
yjm996	T->C	0	0	0	0	0	0	0	C->T	G->T(N)	C->T	T->C	G->A	G->T(N)	G->C(N)	G->A	G->C(N)	C->T(N)	T->C	0	0	0
SK1	0	0	0	0	0	0	0	0	C->T	G->T(N)	0	0	0	0	0	0	0	0	T->C	0	0	0
YJM789	0	0	T->A(N)	C->T(N)	0	0	0	0	C->T	G->T(N)	C->T	T->C	G->A	G->T(N)	G->C(N)	G->A	G->C(N)	C->T(N)	T->C	T->C	G->A(N)	G->T(N)

## Sheet: atp8(1)
Strain	105
yjm1078	C->T
yjm1083	0
yjm1129	C->T
yjm1133	0
yjm1190	0
yjm1199	0
yjm1202	0
yjm1208	0
yjm1242	C->T
yjm1244	C->T
yjm1248	0
yjm1250	C->T
yjm1252	C->T
yjm1273	0
yjm1304	0
yjm1307	0
yjm1311	0
yjm1326	C->T
yjm1332	C->T
yjm1336	C->T
yjm1338	C->T
yjm1341	C->T
yjm1342	0
yjm1355	C->T
yjm1356	C->T
yjm1381	0
yjm1383	0
yjm1385	C->T
yjm1386	C->T
yjm1387	0
yjm1388	0
yjm1389	0
yjm1399	0
yjm1400	0
yjm1401	0
yjm1402	0
yjm1415	C->T
yjm1417	C->T
yjm1418	0
yjm1419	0
yjm1433	C->T
yjm1434	0
yjm1439	0
yjm1443	0
yjm1444	0
yjm1447	0
yjm1450	0
yjm1460	0
yjm1463	0
yjm1477	C->T
yjm1478	0
yjm1479	0
yjm1526	C->T
yjm1527	0
yjm1549	0
yjm1573	0
yjm1574	C->T
yjm1592	0
yjm1615	0
yjm189	C->T
yjm193	C->T
yjm195	0
yjm244	C->T
yjm248	C->T
yjm270	C->T
yjm271	C->T
yjm320	0
yjm326	0
yjm428	C->T
yjm450	0
yjm451	0
yjm453	C->T
yjm456	0
yjm470	0
yjm541	0
yjm554	0
yjm555	0
yjm627	0
yjm681	0
yjm682	0
yjm683	0
yjm689	0
yjm693	0
yjm969	C->T
yjm972	C->T
yjm975	C->T
yjm978	C->T
yjm981	C->T
yjm984	C->T
yjm987	C->T
yjm990	C->T
yjm993	C->T
yjm996	C->T
YPS163	0
SK1	0
YJM789	0

## Sheet: cox1(30)
Strain(cds positions)	159	164	198	228	231	234	261	696	723	726	901	902	921	927	960	963	966	975	978	979	982	984	1116	1119	1125	1173	1182	1474	1475	1485
YJM1078	0	0	G->A	0	0	0	0	C->T	C->T	T->A	C->A	T->C	T->C	A->G	T->C	C->T	A->T	T->C	0	0	C->T(N)	T->C(N)	0	0	0	0	0	0	0	0
YJM1083	0	0	0	0	0	0	A->G	0	0	0	C->A(N)	0	T->C	A->G	T->C	C->T	A->T	T->C	0	A->G(N)	C->T(N)	T->C(N)	0	0	0	0	0	A->G(N)	A->C(N)	T->C
YJM1129	0	T->A(N)	G->A	0	0	0	0	0	C->T	T->A	C->A(N)	0	T->C	A->G	T->C	C->T	A->T	T->C	0	0	C->T(N)	T->C(N)	0	0	0	0	0	0	0	0
YJM1133	A->G	0	0	0	0	0	0	C->T	0	0	C->A(N)	0	T->C	A->G	T->C	C->T	A->T	T->C	0	A->G(N)	C->T(N)	0	0	0	0	0	0	A->G(N)	A->C(N)	T->C
YJM1190	0	0	G->A	0	0	0	0	C->T	0	0	C->A(N)	0	T->C	A->G	T->C	C->T	A->T	T->C	A->G	0	C->T(N)	T->C(N)	0	0	0	0	T->C	A->G(N)	A->C(N)	T->C
YJM1199	0	0	0	0	0	0	0	C->T	0	0	0	0	0	0	0	0	0	0	0	0	0	0	0	0	0	0	T->C	A->G(N)	A->C(N)	T->C
YJM1202	0	0	0	0	0	0	0	C->T	0	0	0	0	0	0	0	0	0	0	0	0	0	0	0	0	0	0	T->C	A->G(N)	A->C(N)	T->C
YJM1208	0	0	0	0	0	0	A->G	0	0	0	C->A(N)	0	T->C	A->G	T->C	C->T	A->T	T->C	0	A->G(N)	C->T(N)	0	C->T	G->T	A->G	A->T	0	A->G(N)	A->C(N)	T->C
YJM1242	0	0	G->A	0	0	0	0	C->T	C->T	T->A	C->A	T->C	T->C	A->G	T->C	C->T	A->T	T->C	0	A->G(N)	C->T(N)	T->C(N)	0	0	0	0	0	0	0	0
YJM1244	0	0	G->A	0	0	0	0	C->T	C->T	T->A	C->A	T->C	T->C	A->G	T->C	C->T	A->T	T->C	0	0	C->T(N)	T->C(N)	0	0	0	0	0	0	0	0
YJM1248	A->G	0	G->A	T->A(N)	0	0	A->G	0	0	0	0	0	0	0	0	0	0	0	0	0	C->T(N)	0	0	0	0	0	0	A->G(N)	A->C(N)	T->C
YJM1250	0	T->A(N)	0	0	A->T	T->A	0	0	0	0	0	0	0	0	0	0	0	0	A->G	0	C->T(N)	0	C->T	G->T	0	0	0	0	0	0
YJM1252	0	0	0	0	A->T	T->A	A->G	0	C->T	T->A	C->A	T->C	T->C	A->G	T->C	C->T	A->T	T->C	0	A->G(N)	C->T(N)	0	0	0	0	0	0	0	0	0
YJM1273	0	0	0	0	A->T	T->A	0	C->T	C->T	T->A	0	0	0	0	0	0	0	0	0	A->G(N)	C->T(N)	T->C(N)	0	0	0	0	0	A->G(N)	A->C(N)	T->C
YJM1304	0	0	0	0	0	0	0	0	0	0	0	0	0	0	0	0	0	0	0	0	0	0	0	0	0	0	0	A->G(N)	A->C(N)	T->C
YJM1307	A->G	0	G->A	0	0	0	0	0	0	T->A	C->A(N)	0	T->C	A->G	T->C	C->T	A->T	T->C	A->G	0	C->T(N)	0	0	0	0	0	0	0	0	0
YJM1311	0	0	G->A	0	0	0	A->G	C->T	0	0	C->A(N)	0	T->C	A->G	T->C	C->T	A->T	T->C	0	A->G(N)	C->T(N)	0	0	0	0	0	0	A->G(N)	A->C(N)	T->C
YJM1326	A->G	0	G->A	0	A->T	0	0	C->T	0	0	C->A(N)	0	T->C	A->G	T->C	C->T	A->T	T->C	0	0	C->T(N)	T->C(N)	0	0	0	0	0	0	0	0
YJM1332	A->G	0	G->A	0	A->T	T->A	A->G	0	0	0	C->A(N)	0	T->C	A->G	T->C	C->T	A->T	T->C	0	0	C->T(N)	T->C(N)	0	0	0	0	0	0	0	0
YJM1336	0	0	G->A	0	0	0	A->G	C->T	C->T	T->A	C->A	T->C	T->C	A->G	0	0	0	0	0	0	C->T(N)	0	0	0	0	0	0	0	0	0
YJM1338	A->G	0	0	0	0	0	A->G	C->T	C->T	T->A	C->A	T->C	T->C	A->G	T->C	C->T	A->T	T->C	0	0	C->T(N)	T->C(N)	0	0	0	0	0	0	0	0
YJM1341	0	T->A(N)	G->A	0	0	0	0	0	0	0	0	0	0	0	0	0	0	0	0	0	C->T(N)	0	0	0	0	0	0	0	0	0
YJM1342	A->G	0	0	0	A->T	T->A	0	0	C->T	T->A	0	0	0	0	T->C	C->T	A->T	T->C	0	0	C->T(N)	T->C(N)	0	0	0	0	0	A->G(N)	A->C(N)	T->C
YJM1355	A->G	0	0	0	0	0	A->G	0	0	0	C->A	T->C	T->C	A->G	T->C	C->T	A->T	T->C	0	A->G(N)	C->T(N)	T->C(N)	0	0	0	0	0	0	0	0
YJM1356	0	0	G->A	0	0	0	A->G	0	0	0	C->A	T->C	T->C	A->G	T->C	C->T	A->T	T->C	0	0	C->T(N)	T->C(N)	0	0	0	0	0	0	0	0
YJM1381	0	0	G->A	0	0	0	A->G	0	0	0	C->A(N)	0	T->C	A->G	T->C	C->T	A->T	T->C	0	A->G(N)	C->T(N)	0	0	0	0	0	0	A->G(N)	A->C(N)	T->C
YJM1383	0	0	0	0	0	0	A->G	0	0	0	C->A(N)	0	T->C	A->G	T->C	C->T	A->T	T->C	0	A->G(N)	C->T(N)	0	0	0	0	0	0	0	0	0
YJM1385	0	0	0	0	0	0	A->G	C->T	0	0	C->A(N)	0	T->C	A->G	T->C	C->T	A->T	T->C	0	A->G(N)	C->T(N)	0	0	0	0	0	0	0	0	0
YJM1386	0	0	G->A	0	0	0	A->G	C->T	0	0	C->A(N)	0	T->C	A->G	T->C	C->T	A->T	T->C	0	A->G(N)	C->T(N)	0	0	0	0	0	0	0	0	0
YJM1387	0	0	0	0	A->T	T->A	0	C->T	C->T	T->A	0	0	0	0	0	0	0	0	0	A->G(N)	C->T(N)	T->C(N)	0	0	0	0	0	A->G(N)	A->C(N)	T->C
YJM1388	A->G	0	0	0	A->T	T->A	A->G	C->T	C->T	T->A	C->A	T->C	T->C	A->G	T->C	C->T	A->T	T->C	0	A->G(N)	C->T(N)	0	0	0	0	0	0	A->G(N)	A->C(N)	T->C
YJM1389	A->G	0	0	0	A->T	T->A	A->G	0	0	0	C->A	T->C	T->C	A->G	T->C	C->T	A->T	T->C	0	A->G(N)	C->T(N)	0	0	0	0	0	0	A->G(N)	A->C(N)	T->C
YJM1399	0	0	0	0	A->T	T->A	0	C->T	C->T	T->A	0	0	0	0	0	0	0	0	0	0	C->T(N)	0	C->T	G->T	0	0	0	A->G(N)	A->C(N)	T->C
YJM1400	A->G	0	0	0	A->T	T->A	0	0	0	0	C->A(N)	0	T->C	A->G	T->C	C->T	A->T	T->C	0	0	C->T(N)	T->C(N)	0	0	0	0	0	A->G(N)	A->C(N)	T->C
YJM1401	A->G	0	G->A	0	0	0	0	0	0	0	C->A(N)	0	T->C	A->G	T->C	C->T	A->T	T->C	A->G	0	C->T(N)	T->C(N)	0	0	0	0	T->C	A->G(N)	A->C(N)	T->C
YJM1402	0	0	0	0	A->T	T->A	0	C->T	C->T	T->A	C->A(N)	0	T->C	A->G	T->C	C->T	A->T	T->C	0	A->G(N)	C->T(N)	0	0	0	0	0	0	A->G(N)	A->C(N)	T->C
YJM1415	0	0	0	0	A->T	T->A	0	C->T	C->T	T->A	C->A	T->C	T->C	A->G	T->C	C->T	A->T	T->C	0	0	C->T(N)	T->C(N)	0	0	0	0	0	0	0	0
YJM1417	A->G	0	0	0	0	0	A->G	0	0	0	C->A	T->C	T->C	A->G	T->C	C->T	A->T	T->C	0	0	C->T(N)	T->C(N)	0	0	0	0	0	0	0	0
YJM1418	0	0	G->A	0	A->T	T->A	0	0	C->T	T->A	0	0	0	0	0	0	0	0	0	0	C->T(N)	0	0	0	0	0	0	A->G(N)	A->C(N)	T->C
YJM1419	A->G	0	0	0	0	0	A->G	0	0	0	0	0	0	0	0	0	0	0	0	A->G(N)	C->T(N)	0	C->T	G->T	0	A->T	T->C	A->G(N)	A->C(N)	T->C
YJM1433	A->G	0	0	0	A->T	T->A	0	0	0	0	0	0	0	0	0	0	0	0	0	0	C->T(N)	0	0	0	0	0	0	0	0	0
YJM1434	0	0	0	0	A->T	T->A	0	C->T	C->T	T->A	0	0	0	0	0	0	0	0	0	A->G(N)	C->T(N)	T->C(N)	0	0	0	0	0	A->G(N)	A->C(N)	T->C
YJM1439	A->G	0	G->A	T->A(N)	0	0	A->G	0	0	0	0	0	0	0	0	0	0	0	0	0	C->T(N)	0	0	0	0	0	0	A->G(N)	A->C(N)	T->C
YJM1443	A->G	0	0	0	A->T	T->A	0	0	0	0	C->A(N)	0	T->C	A->G	T->C	C->T	A->T	T->C	0	A->G(N)	C->T(N)	T->C(N)	C->T	G->T	A->G	A->T	T->C	A->G(N)	A->C(N)	T->C
YJM1444	0	0	0	0	0	0	0	0	0	0	0	0	0	0	0	0	0	0	0	0	0	0	0	0	0	0	0	A->G(N)	A->C(N)	T->C
YJM1447	0	0	0	0	A->T	T->A	A->G	C->T	C->T	T->A	C->A(N)	0	T->C	A->G	T->C	C->T	A->T	T->C	0	0	C->T(N)	0	C->T	G->T	0	A->T	0	A->G(N)	A->C(N)	T->C
YJM1450	0	0	G->A	0	A->T	T->A	0	0	0	0	C->A(N)	0	T->C	A->G	T->C	C->T	A->T	T->C	0	A->G(N)	C->T(N)	T->C(N)	0	0	0	0	0	A->G(N)	A->C(N)	T->C
YJM1460	A->G	0	0	0	A->T	T->A	A->G	0	C->T	T->A	C->A	T->C	T->C	A->G	T->C	C->T	A->T	T->C	0	A->G(N)	C->T(N)	0	0	0	0	0	T->C	A->G(N)	A->C(N)	T->C
YJM1463	0	0	G->A	0	A->T	T->A	A->G	0	0	0	C->A(N)	0	T->C	A->G	T->C	C->T	A->T	T->C	0	A->G(N)	C->T(N)	0	0	0	0	0	0	A->G(N)	A->C(N)	T->C
YJM1477	0	0	G->A	0	0	0	0	C->T	C->T	T->A	C->A	T->C	T->C	A->G	T->C	C->T	A->T	T->C	0	A->G(N)	C->T(N)	T->C(N)	0	0	0	0	0	0	0	0
YJM1478	0	0	0	0	A->T	T->A	0	0	C->T	T->A	0	0	0	0	0	0	0	0	0	0	C->T(N)	0	0	0	0	0	0	0	0	0
YJM1479	A->G	0	0	0	A->T	T->A	0	0	0	0	C->A(N)	0	T->C	A->G	T->C	C->T	A->T	T->C	0	0	C->T(N)	T->C(N)	0	0	0	0	0	A->G(N)	A->C(N)	T->C
YJM1526	0	T->A(N)	G->A	0	0	0	0	0	C->T	T->A	C->A(N)	0	T->C	A->G	T->C	C->T	A->T	T->C	0	0	C->T(N)	T->C(N)	0	0	0	0	0	0	0	0
YJM1527	0	0	0	0	0	0	A->G	0	C->T	T->A	C->A	T->C	T->C	0	0	0	0	0	0	0	C->T(N)	0	0	0	0	0	0	A->G(N)	A->C(N)	T->C
YJM1549	A->G	0	G->A	0	A->T	T->A	0	0	0	0	C->A(N)	0	T->C	A->G	T->C	C->T	A->T	T->C	A->G	0	C->T(N)	T->C(N)	0	0	0	0	0	A->G(N)	A->C(N)	T->C
YJM1573	0	0	0	0	A->T	T->A	0	C->T	C->T	T->A	C->A(N)	0	T->C	A->G	T->C	C->T	A->T	T->C	0	A->G(N)	C->T(N)	0	0	0	0	0	0	A->G(N)	A->C(N)	T->C
YJM1574	0	T->A(N)	G->A	0	0	0	A->G	0	0	0	C->A	T->C	T->C	A->G	T->C	C->T	A->T	T->C	0	A->G(N)	C->T(N)	0	0	0	0	0	0	0	0	0
YJM1592	A->G	0	0	0	A->T	T->A	A->G	0	0	0	C->A	T->C	T->C	A->G	T->C	C->T	A->T	T->C	0	A->G(N)	C->T(N)	0	0	0	0	0	0	A->G(N)	A->C(N)	T->C
YJM1615	0	0	0	0	0	0	A->G	0	0	0	C->A(N)	0	T->C	A->G	T->C	C->T	A->T	T->C	0	A->G(N)	C->T(N)	0	C->T	G->T	A->G	A->T	0	A->G(N)	A->C(N)	T->C
YJM189	A->G	0	0	0	0	0	0	C->T	C->T	T->A	C->A	T->C	T->C	A->G	T->C	C->T	A->T	T->C	0	A->G(N)	C->T(N)	0	0	0	0	0	0	0	0	0
YJM193	A->G	0	0	0	0	0	0	0	0	0	C->A	T->C	T->C	A->G	T->C	C->T	A->T	T->C	0	0	C->T(N)	T->C(N)	0	0	0	0	0	0	0	0
YJM195	0	0	0	0	A->T	T->A	A->G	0	0	0	C->A(N)	0	T->C	A->G	T->C	C->T	A->T	T->C	0	A->G(N)	C->T(N)	0	0	0	0	0	0	A->G(N)	A->C(N)	T->C
YJM244	A->G	0	0	0	0	0	A->G	C->T	C->T	T->A	C->A	T->C	T->C	A->G	T->C	C->T	A->T	T->C	0	0	C->T(N)	T->C(N)	0	0	0	0	0	0	0	0
YJM248	0	0	0	0	A->T	T->A	A->G	0	C->T	T->A	C->A	T->C	T->C	A->G	T->C	C->T	A->T	T->C	0	A->G(N)	C->T(N)	0	0	0	0	0	0	0	0	0
YJM270	0	T->A(N)	G->A	T->A(N)	0	0	0	0	C->T	T->A	C->A(N)	0	T->C	A->G	T->C	C->T	A->T	T->C	0	0	C->T(N)	T->C(N)	0	0	0	0	0	0	0	0
YJM271	A->G	0	0	0	0	0	0	0	0	0	C->A	T->C	T->C	A->G	T->C	C->T	A->T	T->C	0	0	C->T(N)	T->C(N)	0	0	0	0	0	0	0	0
YJM320	0	0	0	0	0	0	A->G	C->T	0	0	C->A(N)	0	T->C	A->G	T->C	C->T	A->T	T->C	0	0	C->T(N)	0	0	0	0	0	0	A->G(N)	A->C(N)	T->C
YJM326	0	0	0	0	0	0	A->G	C->T	0	0	C->A(N)	0	T->C	A->G	T->C	C->T	A->T	T->C	0	A->G(N)	C->T(N)	0	0	0	0	0	0	A->G(N)	A->C(N)	T->C
YJM428	0	0	G->A	0	0	0	A->G	0	0	0	C->A	T->C	T->C	A->G	T->C	C->T	A->T	T->C	0	A->G(N)	C->T(N)	0	0	0	0	0	0	0	0	0
YJM450	0	0	G->A	0	0	0	A->G	0	0	0	0	0	0	0	0	0	0	0	0	0	0	0	0	0	0	0	0	A->G(N)	A->C(N)	T->C
YJM451	0	0	0	0	0	0	A->G	0	0	0	C->A(N)	0	T->C	A->G	T->C	C->T	A->T	T->C	0	A->G(N)	C->T(N)	0	C->T	G->T	A->G	A->T	0	A->G(N)	A->C(N)	T->C
YJM453	0	0	G->A	0	0	0	0	0	0	0	C->A	T->C	T->C	A->G	T->C	C->T	A->T	T->C	0	0	C->T(N)	T->C(N)	0	0	0	0	0	0	0	0
YJM456	0	0	0	0	0	0	0	0	0	0	C->A(N)	0	T->C	A->G	T->C	C->T	A->T	T->C	0	A->G(N)	C->T(N)	T->C(N)	C->T	G->T	A->G	A->T	T->C	A->G(N)	A->C(N)	T->C
YJM470	0	0	0	0	A->T	T->A	0	0	0	0	0	0	0	0	0	0	0	0	0	A->G(N)	C->T(N)	T->C(N)	C->T	G->T	0	0	0	A->G(N)	A->C(N)	T->C
YJM541	0	0	0	0	0	0	A->G	C->T	0	0	C->A(N)	0	T->C	A->G	T->C	C->T	A->T	T->C	0	0	C->T(N)	0	0	0	0	0	0	A->G(N)	A->C(N)	T->C
YJM554	0	0	0	0	0	0	A->G	C->T	0	0	C->A(N)	0	T->C	A->G	T->C	C->T	A->T	T->C	0	0	C->T(N)	0	0	0	0	0	0	A->G(N)	A->C(N)	T->C
YJM555	0	0	G->A	0	0	0	0	0	0	0	C->A(N)	0	T->C	A->G	T->C	C->T	A->T	T->C	0	0	C->T(N)	0	0	0	0	0	T->C	A->G(N)	A->C(N)	T->C
YJM627	A->G	0	G->A	T->A(N)	0	0	A->G	0	0	0	0	0	0	0	0	0	0	0	0	0	C->T(N)	0	0	0	0	0	0	A->G(N)	A->C(N)	T->C
YJM681	A->G	0	0	0	0	0	0	0	0	0	C->A(N)	0	T->C	A->G	T->C	C->T	A->T	T->C	A->G	0	C->T(N)	T->C(N)	0	0	0	0	T->C	A->G(N)	A->C(N)	T->C
YJM682	0	0	0	0	0	0	A->G	C->T	0	0	C->A(N)	0	T->C	A->G	T->C	C->T	A->T	T->C	0	A->G(N)	C->T(N)	0	0	0	0	0	0	A->G(N)	A->C(N)	T->C
YJM683	0	0	0	0	0	0	A->G	C->T	0	0	C->A(N)	0	T->C	A->G	T->C	C->T	A->T	T->C	0	A->G(N)	C->T(N)	0	0	0	0	0	0	A->G(N)	A->C(N)	T->C
YJM689	A->G	0	0	0	0	0	0	0	0	0	C->A(N)	0	T->C	A->G	T->C	C->T	A->T	T->C	0	A->G(N)	C->T(N)	T->C(N)	0	0	0	0	0	A->G(N)	A->C(N)	T->C
YJM693	A->G	0	0	0	0	0	A->G	C->T	0	0	0	0	0	0	0	0	0	0	0	0	0	0	0	0	0	0	0	A->G(N)	A->C(N)	T->C
YJM969	0	T->A(N)	0	0	A->T	T->A	A->G	C->T	C->T	T->A	C->A	T->C	T->C	A->G	T->C	C->T	A->T	T->C	0	0	C->T(N)	T->C(N)	0	0	0	0	0	0	0	0
YJM972	0	T->A(N)	0	0	A->T	T->A	A->G	C->T	C->T	T->A	C->A	T->C	T->C	A->G	T->C	C->T	A->T	T->C	0	0	C->T(N)	T->C(N)	0	0	0	0	0	0	0	0
YJM975	0	T->A(N)	0	0	A->T	T->A	A->G	C->T	C->T	T->A	C->A	T->C	T->C	A->G	T->C	C->T	A->T	T->C	0	0	C->T(N)	T->C(N)	0	0	0	0	0	0	0	0
YJM978	0	T->A(N)	0	0	A->T	T->A	A->G	C->T	C->T	T->A	C->A	T->C	T->C	A->G	T->C	C->T	A->T	T->C	0	0	C->T(N)	T->C(N)	0	0	0	0	0	0	0	0
YJM981	0	T->A(N)	0	0	A->T	T->A	A->G	C->T	C->T	T->A	C->A	T->C	T->C	A->G	T->C	C->T	A->T	T->C	0	0	C->T(N)	T->C(N)	0	0	0	0	0	0	0	0
YJM984	0	T->A(N)	0	0	A->T	T->A	A->G	C->T	C->T	T->A	C->A	T->C	T->C	A->G	T->C	C->T	A->T	T->C	0	0	C->T(N)	T->C(N)	0	0	0	0	0	0	0	0
YJM987	0	T->A(N)	0	0	A->T	T->A	A->G	C->T	C->T	T->A	C->A	T->C	T->C	A->G	T->C	C->T	A->T	T->C	0	0	C->T(N)	T->C(N)	0	0	0	0	0	0	0	0
YJM990	0	T->A(N)	0	0	A->T	T->A	A->G	C->T	C->T	T->A	C->A	T->C	T->C	A->G	T->C	C->T	A->T	T->C	0	0	C->T(N)	T->C(N)	0	0	0	0	0	0	0	0
YJM993	0	T->A(N)	0	0	A->T	T->A	A->G	C->T	C->T	T->A	C->A	T->C	T->C	A->G	T->C	C->T	A->T	T->C	0	0	C->T(N)	T->C(N)	0	0	0	0	0	0	0	0
YJM996	0	T->A(N)	0	0	A->T	T->A	A->G	C->T	C->T	T->A	C->A	T->C	T->C	A->G	T->C	C->T	A->T	T->C	0	0	C->T(N)	T->C(N)	0	0	0	0	0	0	0	0
SK1	A->G	0	G->A	T->A(N)	0	0	0	0	0	0	0	0	0	0	0	0	0	0	0	0	0	0	0	0	0	0	0	A->G(N)	A->C(N)	T->C
YJM789	0	0	0	0	0	0	0	C->T	0	0	C->A	T->C	T->C	A->G	T->C	C->T	A->T	T->C	0	A->G(N)	C->T(N)	T->C(N)	0	0	0	0	0	A->G(N)	A->C(N)	T->C
YJM789

## Sheet: cox2(24)
Strain	294	468	570	624	627	633	648	658	659	663	664	665	666	669	672	675	678	679	680	684	693	705	708	711
yjm1078	0	0	0	0	0	0	0	0	0	0	0	0	0	0	0	0	0	0	0	0	0	G->A	0	0
yjm1083	T->C	T->A	T->C	0	T->A	0	0	0	0	0	0	0	0	0	0	0	0	0	0	0	0	G->A	0	0
yjm1129	0	0	0	0	0	0	C->T	0	0	0	0	0	0	0	0	0	0	0	0	0	0	G->A	0	0
yjm1133	0	0	0	0	0	0	0	0	0	0	0	0	0	0	0	0	0	0	0	0	0	0	0	0
yjm1190	T->C	T->A	T->C	T->C	T->A	T->C	0	G->C(N)	C->A(N)	T->C	0	0	T->A	G->A	0	T->C	G->A	A->C	C->T	T->A	T->C	G->A	C->T	0
yjm1199	T->C	T->A	T->C	T->C	T->A	T->C	0	G->C(N)	C->A(N)	T->C	0	0	T->A	G->A	0	T->C	G->A	A->C	C->T	T->A	T->C	G->A	C->T	0
yjm1202	T->C	T->A	T->C	T->C	T->A	T->C	0	G->C(N)	C->A(N)	T->C	0	0	T->A	G->A	0	T->C	G->A	A->C	C->T	T->A	T->C	G->A	C->T	0
yjm1208	T->C	T->A	T->C	T->C	T->A	0	C->T	G->C(N)	C->A(N)	0	T->A	C->G	0	G->A	0	T->C	G->A	A->C	C->T	T->A	T->C	G->A	C->T	A->G
yjm1242	0	0	0	0	0	0	0	0	0	0	0	0	0	0	0	0	0	0	0	0	0	0	0	0
yjm1244	0	0	0	0	0	0	C->T	0	0	0	0	0	0	0	0	0	0	0	0	0	0	G->A	0	0
yjm1248	0	T->A	T->C	0	T->A	0	0	0	0	0	0	0	0	0	0	0	0	0	0	0	0	0	0	0
yjm1250	0	0	0	0	0	0	0	G->C(N)	C->A(N)	0	0	0	T->A	G->A	G->A	0	G->A	A->C	C->T	T->A	T->C	G->A	C->T	0
yjm1252	0	0	0	0	0	0	0	0	0	0	0	0	0	0	0	0	0	0	0	0	0	0	0	0
yjm1273	T->C	T->A	T->C	0	T->A	0	C->T	G->C(N)	C->A(N)	T->C	0	0	T->A	0	0	T->C	G->A	A->C	C->T	T->A	T->C	G->A	C->T	0
yjm1304	T->C	T->A	T->C	T->C	T->A	T->C	0	G->C(N)	C->A(N)	T->C	0	0	T->A	G->A	0	T->C	G->A	A->C	C->T	T->A	T->C	G->A	C->T	0
yjm1307	0	0	0	0	0	0	0	0	0	0	0	0	0	0	0	0	0	0	0	0	0	0	0	0
yjm1311	T->C	T->A	T->C	0	0	0	0	0	0	0	0	0	0	0	0	0	0	0	0	0	0	0	0	0
yjm1326	T->C	T->A	T->C	T->C	T->A	T->C	0	G->C(N)	C->A(N)	T->C	0	0	T->A	G->A	0	T->C	G->A	A->C	C->T	T->A	T->C	G->A	C->T	0
yjm1332	0	0	0	0	0	0	0	0	0	0	0	0	0	0	0	0	0	0	0	0	0	0	0	0
yjm1336	0	0	0	0	0	0	C->T	0	0	0	0	0	0	0	0	0	0	0	0	0	0	G->A	0	0
yjm1338	0	0	0	0	0	0	0	G->C(N)	C->A(N)	0	0	0	T->A	G->A	G->A	0	G->A	A->C	C->T	T->A	T->C	G->A	C->T	0
yjm1341	0	0	0	0	0	0	0	G->C(N)	C->A(N)	0	0	0	T->A	G->A	G->A	0	G->A	A->C	C->T	T->A	T->C	G->A	C->T	0
yjm1342	T->C	T->A	T->C	T->C	T->A	T->C	0	G->C(N)	C->A(N)	T->C	0	0	T->A	G->A	0	T->C	G->A	A->C	C->T	T->A	T->C	G->A	C->T	0
yjm1355	T->C	T->A	T->C	0	T->A	0	0	0	0	0	0	0	0	0	0	0	0	0	0	0	0	G->A	0	0
yjm1356	0	0	0	0	0	0	0	0	0	0	0	0	0	0	0	0	0	0	0	0	0	0	0	0
yjm1381	0	T->A	T->C	0	T->A	0	0	0	0	0	0	0	0	0	0	0	0	0	0	0	0	G->A	0	0
yjm1383	0	T->A	T->C	T->C	T->A	T->C	C->T	G->C(N)	C->A(N)	T->C	0	0	T->A	G->A	0	T->C	G->A	A->C	C->T	T->A	T->C	G->A	C->T	0
yjm1385	T->C	T->A	0	0	0	0	0	0	0	0	0	0	0	0	0	0	0	0	0	0	0	0	0	0
yjm1386	0	T->A	T->C	T->C	T->A	T->C	0	G->C(N)	C->A(N)	T->C	0	0	T->A	G->A	0	T->C	G->A	A->C	C->T	T->A	T->C	G->A	C->T	0
yjm1387	T->C	T->A	T->C	0	T->A	0	C->T	G->C(N)	C->A(N)	T->C	0	0	T->A	0	0	T->C	G->A	A->C	C->T	T->A	T->C	G->A	C->T	0
yjm1388	T->C	T->A	T->C	T->C	T->A	T->C	0	G->C(N)	C->A(N)	T->C	0	0	T->A	G->A	0	T->C	G->A	A->C	C->T	T->A	T->C	G->A	C->T	0
yjm1389	T->C	T->A	T->C	T->C	T->A	T->C	0	G->C(N)	C->A(N)	T->C	0	0	T->A	G->A	0	T->C	G->A	A->C	C->T	T->A	T->C	G->A	C->T	0
yjm1399	0	T->A	T->C	0	0	0	0	G->C(N)	C->A(N)	T->C	T->A	C->G	0	0	0	0	0	0	0	0	0	G->A	0	0
yjm1400	T->C	T->A	T->C	T->C	T->A	0	C->T	0	0	0	0	0	0	0	0	0	0	0	0	0	0	G->A	0	0
yjm1401	T->C	T->A	T->C	0	0	0	0	0	0	0	0	0	0	0	0	0	0	0	0	0	0	0	0	0
yjm1402	T->C	T->A	T->C	0	T->A	0	C->T	G->C(N)	C->A(N)	0	T->A	C->G	0	G->A	0	T->C	G->A	A->C	C->T	T->A	T->C	G->A	C->T	A->G
yjm1415	0	0	0	0	0	0	0	G->C(N)	C->A(N)	0	T->A	C->G	0	G->A	0	T->C	G->A	A->C	C->T	T->A	T->C	G->A	C->T	A->G
yjm1417	0	0	0	0	0	0	0	G->C(N)	C->A(N)	0	0	0	T->A	G->A	G->A	0	G->A	A->C	C->T	T->A	T->C	G->A	C->T	0
yjm1418	T->C	T->A	T->C	T->C	T->A	T->C	C->T	G->C(N)	C->A(N)	T->C	0	0	T->A	0	0	T->C	G->A	A->C	C->T	T->A	T->C	G->A	C->T	0
yjm1419	T->C	T->A	T->C	T->C	T->A	T->C	0	G->C(N)	C->A(N)	T->C	0	0	T->A	G->A	0	0	G->A	A->C	C->T	T->A	T->C	G->A	C->T	0
yjm1433	T->C	T->A	T->C	T->C	T->A	0	C->T	G->C(N)	C->A(N)	0	T->A	C->G	0	G->A	0	T->C	G->A	A->C	C->T	T->A	T->C	G->A	C->T	A->G
yjm1434	T->C	T->A	T->C	0	T->A	0	C->T	G->C(N)	C->A(N)	T->C	0	0	T->A	0	0	T->C	G->A	A->C	C->T	T->A	T->C	G->A	C->T	0
yjm1439	0	T->A	T->C	0	T->A	0	0	0	0	0	0	0	0	0	0	0	0	0	0	0	0	0	0	0
yjm1443	T->C	T->A	T->C	T->C	T->A	T->C	0	G->C(N)	C->A(N)	T->C	0	0	T->A	G->A	0	T->C	G->A	A->C	C->T	T->A	T->C	G->A	C->T	0
yjm1444	T->C	T->A	T->C	T->C	T->A	T->C	C->T	G->C(N)	C->A(N)	T->C	0	0	T->A	0	0	T->C	G->A	A->C	C->T	T->A	T->C	G->A	C->T	0
yjm1447	T->C	T->A	T->C	T->C	T->A	0	C->T	G->C(N)	C->A(N)	0	T->A	C->G	0	G->A	0	T->C	G->A	A->C	C->T	T->A	T->C	G->A	C->T	0
yjm1450	T->C	T->A	T->C	0	T->A	T->C	0	G->C(N)	C->A(N)	T->C	0	0	T->A	G->A	0	T->C	G->A	A->C	C->T	T->A	T->C	G->A	C->T	0
yjm1460	T->C	T->A	T->C	T->C	T->A	T->C	0	G->C(N)	C->A(N)	0	T->A	C->G	0	G->A	0	T->C	G->A	A->C	C->T	T->A	T->C	G->A	C->T	A->G
yjm1463	0	0	0	0	T->A	0	C->T	0	0	0	0	0	0	0	0	0	0	0	0	0	0	G->A	0	0
yjm1477	0	0	0	0	0	0	0	0	0	0	0	0	0	0	0	0	0	0	0	0	0	0	0	0
yjm1478	T->C	T->A	0	0	0	0	C->T	0	0	0	0	0	0	0	0	0	0	0	0	0	0	G->A	0	0
yjm1479	T->C	T->A	T->C	T->C	T->A	0	C->T	0	0	0	0	0	0	0	0	0	0	0	0	0	0	G->A	0	0
yjm1526	0	0	0	0	0	0	C->T	0	0	0	0	0	0	0	0	0	0	0	0	0	0	G->A	0	0
yjm1527	T->C	T->A	T->C	T->C	T->A	T->C	C->T	G->C(N)	C->A(N)	T->C	0	0	T->A	0	0	T->C	G->A	A->C	C->T	T->A	T->C	G->A	C->T	0
yjm1549	T->C	T->A	T->C	T->C	T->A	T->C	C->T	G->C(N)	C->A(N)	T->C	0	0	T->A	G->A	0	T->C	G->A	A->C	C->T	T->A	T->C	G->A	C->T	0
yjm1573	T->C	T->A	T->C	0	T->A	0	C->T	G->C(N)	C->A(N)	0	T->A	C->G	0	G->A	0	T->C	G->A	A->C	C->T	T->A	T->C	G->A	C->T	A->G
yjm1574	T->C	T->A	T->C	T->C	T->A	0	C->T	G->C(N)	C->A(N)	0	T->A	C->G	0	G->A	0	T->C	G->A	A->C	C->T	T->A	T->C	G->A	C->T	A->G
yjm1592	T->C	T->A	T->C	T->C	T->A	T->C	0	G->C(N)	C->A(N)	T->C	0	0	T->A	G->A	0	T->C	G->A	A->C	C->T	T->A	T->C	G->A	C->T	0
yjm1615	T->C	T->A	T->C	T->C	T->A	0	C->T	G->C(N)	C->A(N)	0	T->A	C->G	0	G->A	0	T->C	G->A	A->C	C->T	T->A	T->C	G->A	C->T	A->G
yjm189	0	0	0	0	0	0	0	G->C(N)	C->A(N)	0	0	0	T->A	G->A	G->A	0	G->A	A->C	C->T	T->A	T->C	G->A	C->T	0
yjm193	T->C	T->A	0	0	0	0	C->T	0	0	0	0	0	0	0	0	0	0	0	0	0	0	G->A	0	0
yjm195	0	T->A	T->C	T->C	T->A	T->C	C->T	G->C(N)	C->A(N)	T->C	T->A	C->G	0	G->A	0	T->C	G->A	A->C	C->T	T->A	T->C	G->A	C->T	A->G
yjm244	0	0	0	0	0	0	0	G->C(N)	C->A(N)	0	0	0	T->A	G->A	G->A	0	G->A	A->C	C->T	T->A	T->C	G->A	C->T	0
yjm248	0	0	0	0	0	0	0	G->C(N)	C->A(N)	0	0	0	T->A	G->A	G->A	0	G->A	A->C	C->T	T->A	T->C	G->A	C->T	0
yjm270	0	0	0	0	T->A	0	C->T	G->C(N)	C->A(N)	0	T->A	C->G	0	G->A	0	T->C	G->A	A->C	C->T	T->A	T->C	G->A	C->T	A->G
yjm271	T->C	T->A	0	0	0	0	C->T	0	0	0	0	0	0	0	0	0	0	0	0	0	0	G->A	0	0
yjm320	0	0	0	0	0	0	0	0	0	0	0	0	0	0	0	0	0	0	0	0	0	0	0	0
yjm326	0	0	0	0	0	0	0	0	0	0	0	0	0	0	0	0	0	0	0	0	0	0	0	0
yjm428	0	0	0	0	0	0	0	0	0	0	0	0	0	0	0	0	0	0	0	0	0	0	0	0
yjm450	T->C	T->A	T->C	T->C	T->A	T->C	C->T	G->C(N)	C->A(N)	T->C	0	0	T->A	0	0	T->C	G->A	A->C	C->T	T->A	T->C	G->A	C->T	0
yjm451	T->C	T->A	T->C	T->C	T->A	T->C	C->T	G->C(N)	C->A(N)	T->C	0	0	T->A	0	0	T->C	G->A	A->C	C->T	T->A	T->C	G->A	C->T	0
yjm453	0	0	0	0	T->A	0	C->T	0	0	0	0	0	0	0	0	0	0	0	0	0	0	G->A	0	0
yjm456	T->C	T->A	T->C	T->C	T->A	T->C	0	G->C(N)	C->A(N)	T->C	0	0	T->A	G->A	0	T->C	G->A	A->C	C->T	T->A	T->C	G->A	C->T	0
yjm470	T->C	T->A	T->C	T->C	T->A	0	C->T	G->C(N)	C->A(N)	0	T->A	C->G	0	G->A	0	T->C	G->A	A->C	C->T	T->A	T->C	G->A	C->T	A->G
yjm541	0	0	0	0	0	0	0	0	0	0	0	0	0	0	0	0	0	0	0	0	0	0	0	0
yjm554	0	0	0	0	0	0	0	0	0	0	0	0	0	0	0	0	0	0	0	0	0	0	0	0
yjm555	T->C	T->A	T->C	T->C	T->A	T->C	0	G->C(N)	C->A(N)	T->C	0	0	T->A	G->A	0	T->C	G->A	A->C	C->T	T->A	T->C	G->A	C->T	0
yjm627	0	0	0	0	0	0	C->T	0	0	0	0	0	0	0	0	0	0	0	0	0	0	G->A	0	0
yjm681	T->C	T->A	T->C	0	T->A	T->C	0	G->C(N)	C->A(N)	T->C	0	0	T->A	G->A	0	T->C	G->A	A->C	C->T	T->A	T->C	G->A	C->T	0
yjm682	0	0	0	0	0	0	0	0	0	0	0	0	0	0	0	0	0	0	0	0	0	0	0	0
yjm683	0	0	0	0	0	0	0	0	0	0	0	0	0	0	0	0	0	0	0	0	0	0	0	0
yjm689	T->C	T->A	T->C	0	T->A	0	0	0	0	0	0	0	0	0	0	0	0	0	0	0	0	G->A	0	0
yjm693	T->C	T->A	T->C	T->C	T->A	0	C->T	0	0	0	0	0	0	0	0	0	0	0	0	0	0	G->A	0	0
yjm969	0	0	0	0	0	0	0	G->C(N)	C->A(N)	0	0	0	T->A	G->A	G->A	0	G->A	A->C	C->T	T->A	T->C	G->A	C->T	0
yjm972	0	0	0	0	0	0	0	G->C(N)	C->A(N)	0	0	0	T->A	G->A	G->A	0	G->A	A->C	C->T	T->A	T->C	G->A	C->T	0
yjm975	0	0	0	0	0	0	0	G->C(N)	C->A(N)	0	0	0	T->A	G->A	G->A	0	G->A	A->C	C->T	T->A	T->C	G->A	C->T	0
yjm978	0	0	0	0	0	0	0	G->C(N)	C->A(N)	0	0	0	T->A	G->A	G->A	0	G->A	A->C	C->T	T->A	T->C	G->A	C->T	0
yjm981	0	0	0	0	0	0	0	G->C(N)	C->A(N)	0	0	0	T->A	G->A	G->A	0	G->A	A->C	C->T	T->A	T->C	G->A	C->T	0
yjm984	0	0	0	0	0	0	0	G->C(N)	C->A(N)	0	0	0	T->A	G->A	G->A	0	G->A	A->C	C->T	T->A	T->C	G->A	C->T	0
yjm987	0	0	0	0	0	0	0	G->C(N)	C->A(N)	0	0	0	T->A	G->A	G->A	0	G->A	A->C	C->T	T->A	T->C	G->A	C->T	0
yjm990	0	0	0	0	0	0	0	G->C(N)	C->A(N)	0	0	0	T->A	G->A	G->A	0	G->A	A->C	C->T	T->A	T->C	G->A	C->T	0
yjm993	0	0	0	0	0	0	0	G->C(N)	C->A(N)	0	0	0	T->A	G->A	G->A	0	G->A	A->C	C->T	T->A	T->C	G->A	C->T	0
yjm996	0	0	0	0	0	0	0	G->C(N)	C->A(N)	0	0	0	T->A	G->A	G->A	0	G->A	A->C	C->T	T->A	T->C	G->A	C->T	0
SK1	0	T->A	0	0	T->A	0	0	0	0	0	0	0	0	0	0	0	0	0	0	0	0	0	0	0
YJM789	T->C	T->A	T->C	T->C	T->A	T->C	0	G->C(N)	C->A(N)	T->C	0	0	T->A	G->A	0	T->C	G->A	A->C	C->T	T->A	T->C	G->A	C->T	0

## Sheet: cox3(12)
Strain	69	378	480	501	540	717	768	787	789	792	795	807
yjm1078	T->A	C->T	0	0	T->C	0	0	0	0	0	0	0
yjm1083	T->A	0	0	0	0	0	0	G->C(N)	C->A(N)	C->T	C->T	C->T
yjm1129	T->A	C->T	C->T	0	T->C	T->C	0	G->C(N)	C->A(N)	C->T	C->T	C->T
yjm1133	T->A	C->T	0	0	T->C	0	0	0	0	0	0	0
yjm1190	T->A	0	0	0	T->C	T->C	0	0	0	0	0	0
yjm1199	T->A	0	0	0	T->C	T->C	0	G->C(N)	C->A(N)	C->T	C->T	C->T
yjm1202	T->A	0	0	0	T->C	T->C	0	G->C(N)	C->A(N)	C->T	C->T	C->T
yjm1208	T->A	C->T	0	0	T->C	0	0	0	0	0	C->T	0
yjm1242	T->A	C->T	0	0	T->C	0	0	0	0	0	0	0
yjm1244	T->A	C->T	0	0	T->C	0	0	G->C(N)	C->A(N)	C->T	C->T	C->T
yjm1248	T->A	0	0	C->T	0	T->C	C->T	0	C->A	0	0	C->T
yjm1250	T->A	C->T	0	0	T->C	0	0	G->C(N)	C->A(N)	C->T	C->T	C->T
yjm1252	T->A	C->T	0	0	T->C	0	0	0	0	0	0	0
yjm1273	T->A	C->T	0	0	0	0	0	0	0	0	0	0
yjm1304	T->A	C->T	0	0	0	0	0	0	0	0	0	0
yjm1307	0	0	0	0	0	0	0	0	0	0	0	0
yjm1311	0	0	0	C->T	0	0	0	0	0	0	C->T	0
yjm1326	0	0	0	0	0	0	0	G->C(N)	C->A(N)	C->T	C->T	C->T
yjm1332	T->A	C->T	0	0	T->C	T->C	0	G->C(N)	C->A(N)	C->T	C->T	C->T
yjm1336	T->A	C->T	0	0	T->C	0	0	0	0	0	0	0
yjm1338	T->A	C->T	0	0	T->C	0	C->T	G->C(N)	C->A(N)	C->T	C->T	C->T
yjm1341	T->A	C->T	0	0	T->C	0	C->T	G->C(N)	C->A(N)	C->T	C->T	C->T
yjm1342	T->A	C->T	0	0	T->C	T->C	0	G->C(N)	C->A(N)	C->T	C->T	C->T
yjm1355	T->A	0	0	0	0	0	0	G->C(N)	C->A(N)	C->T	C->T	C->T
yjm1356	T->A	C->T	C->T	0	T->C	0	0	G->C(N)	C->A(N)	C->T	C->T	C->T
yjm1381	T->A	0	0	0	0	T->C	0	G->C(N)	C->A(N)	C->T	C->T	C->T
yjm1383	T->A	C->T	0	0	T->C	T->C	0	G->C(N)	C->A(N)	C->T	C->T	C->T
yjm1385	T->A	0	0	0	T->C	T->C	0	G->C(N)	C->A(N)	C->T	C->T	C->T
yjm1386	T->A	C->T	0	0	T->C	T->C	0	G->C(N)	C->A(N)	C->T	C->T	C->T
yjm1387	T->A	C->T	0	C->T	0	0	0	0	0	0	C->T	0
yjm1388	0	0	0	0	T->C	0	0	0	0	0	C->T	0
yjm1389	T->A	0	0	0	0	0	0	0	0	0	C->T	0
yjm1399	T->A	C->T	C->T	0	T->C	T->C	0	0	C->A	0	C->T	0
yjm1400	T->A	C->T	0	C->T	0	0	0	G->C(N)	C->A(N)	C->T	C->T	C->T
yjm1401	T->A	0	0	C->T	0	0	0	0	0	0	C->T	0
yjm1402	T->A	C->T	0	0	0	0	0	0	0	0	0	0
yjm1415	T->A	C->T	C->T	0	T->C	T->C	0	G->C(N)	C->A(N)	C->T	C->T	C->T
yjm1417	T->A	C->T	0	0	T->C	T->C	0	G->C(N)	C->A(N)	C->T	C->T	C->T
yjm1418	T->A	C->T	0	0	T->C	T->C	0	0	0	0	0	0
yjm1419	T->A	C->T	0	0	T->C	0	0	0	0	0	C->T	0
yjm1433	T->A	C->T	0	0	T->C	T->C	0	G->C(N)	C->A(N)	C->T	C->T	C->T
yjm1434	T->A	C->T	0	0	0	0	0	0	0	0	0	0
yjm1439	T->A	0	0	C->T	0	T->C	C->T	0	C->A	0	0	C->T
yjm1443	T->A	0	0	0	T->C	T->C	0	0	0	0	0	0
yjm1444	T->A	0	0	0	T->C	0	0	0	C->A	0	0	0
yjm1447	T->A	C->T	0	0	T->C	T->C	0	0	C->A	0	0	0
yjm1450	T->A	C->T	0	0	0	T->C	0	0	0	0	0	0
yjm1460	T->A	0	0	C->T	0	0	0	G->C(N)	C->A(N)	C->T	C->T	C->T
yjm1463	T->A	C->T	C->T	0	T->C	0	0	G->C(N)	C->A(N)	C->T	C->T	C->T
yjm1477	T->A	C->T	0	0	T->C	0	0	0	0	0	0	0
yjm1478	T->A	C->T	0	0	0	0	0	G->C(N)	C->A(N)	C->T	C->T	C->T
yjm1479	T->A	C->T	0	C->T	0	0	0	G->C(N)	C->A(N)	C->T	C->T	C->T
yjm1526	T->A	C->T	C->T	0	T->C	T->C	0	G->C(N)	C->A(N)	C->T	C->T	C->T
yjm1527	T->A	0	0	0	T->C	0	0	0	C->A	0	0	0
yjm1549	0	0	0	0	0	0	0	G->C(N)	C->A(N)	C->T	C->T	C->T
yjm1573	T->A	C->T	0	0	0	0	0	0	0	0	0	0
yjm1574	T->A	C->T	0	0	T->C	T->C	C->T	G->C(N)	C->A(N)	C->T(N)	C->T	C->T
yjm1592	T->A	0	0	0	0	0	0	0	0	0	C->T	0
yjm1615	T->A	C->T	0	0	T->C	0	0	0	0	0	C->T	0
yjm189	T->A	C->T	0	0	T->C	T->C	0	G->C(N)	C->A(N)	C->T	C->T	C->T
yjm193	T->A	C->T	0	0	T->C	0	0	G->C(N)	C->A(N)	C->T	C->T	C->T
yjm195	T->A	0	0	C->T	0	0	0	0	C->A	C->T	0	0
yjm244	T->A	C->T	C->T	0	T->C	T->C	0	G->C(N)	C->A(N)	C->T	C->T	C->T
yjm248	T->A	C->T	0	0	T->C	0	C->T	G->C(N)	C->A(N)	C->T	C->T	C->T
yjm270	T->A	C->T	0	0	T->C	T->C	C->T	G->C(N)	C->A(N)	C->T(N)	C->T	C->T
yjm271	T->A	C->T	0	0	T->C	0	0	G->C(N)	C->A(N)	C->T	C->T	C->T
yjm320	T->A	C->T	0	0	0	0	0	0	0	0	0	0
yjm326	T->A	C->T	0	0	T->C	0	0	0	0	0	0	0
yjm428	T->A	C->T	0	0	T->C	T->C	0	G->C(N)	C->A(N)	C->T	C->T	C->T
yjm450	T->A	0	0	0	T->C	0	0	G->C(N)	C->A(N)	C->T	C->T	C->T
yjm451	T->A	0	0	0	T->C	0	0	0	C->A	0	0	0
yjm453	T->A	C->T	0	0	T->C	0	0	0	0	0	0	0
yjm456	T->A	C->T	0	0	0	0	0	0	0	0	0	0
yjm470	T->A	C->T	0	C->T	0	0	0	0	0	0	0	0
yjm541	T->A	C->T	0	0	0	0	0	0	0	0	0	0
yjm554	T->A	C->T	0	0	0	0	0	0	0	0	0	0
yjm555	T->A	C->T	0	0	0	0	0	0	0	0	0	0
yjm627	T->A	C->T	0	0	T->C	0	0	0	0	0	0	0
yjm681	T->A	0	0	C->T	0	0	0	0	0	0	C->T	0
yjm682	T->A	C->T	0	0	T->C	0	0	0	0	0	0	0
yjm683	T->A	C->T	0	0	T->C	0	0	0	0	0	0	0
yjm689	T->A	0	0	0	0	0	0	G->C(N)	C->A(N)	C->T	C->T	C->T
yjm693	T->A	C->T	0	0	T->C	T->C	0	G->C(N)	C->A(N)	C->T	C->T	C->T
yjm969	T->A	C->T	0	0	T->C	0	0	G->C(N)	C->A(N)	C->T	C->T	C->T
yjm972	T->A	C->T	0	0	T->C	0	0	G->C(N)	C->A(N)	C->T	C->T	C->T
yjm975	T->A	C->T	0	0	T->C	0	0	G->C(N)	C->A(N)	C->T	C->T	C->T
yjm978	T->A	C->T	0	0	T->C	0	0	G->C(N)	C->A(N)	C->T	C->T	C->T
yjm981	T->A	C->T	0	0	T->C	0	0	G->C(N)	C->A(N)	C->T	C->T	C->T
yjm984	T->A	C->T	0	0	T->C	0	0	G->C(N)	C->A(N)	C->T	C->T	C->T
yjm987	T->A	C->T	0	0	T->C	0	0	G->C(N)	C->A(N)	C->T	C->T	C->T
yjm990	T->A	C->T	0	0	T->C	0	0	G->C(N)	C->A(N)	C->T	C->T	C->T
yjm993	T->A	C->T	0	0	T->C	0	0	G->C(N)	C->A(N)	C->T	C->T	C->T
yjm996	T->A	C->T	0	0	T->C	0	0	G->C(N)	C->A(N)	C->T	C->T	C->T
SK1	T->A	0	0	0	0	T->C	C->T	0	0	0	0	0
YJM789	T->A	C->T	0	0	0	0	0	0	0	0	0	0

## Sheet: oli1(1)
Strain	165
yjm1078	C->T
yjm1083	0
yjm1129	0
yjm1133	0
yjm1190	0
yjm1199	0
yjm1202	0
yjm1208	0
yjm1242	C->T
yjm1244	0
yjm1248	0
yjm1250	0
yjm1252	0
yjm1273	0
yjm1304	0
yjm1307	0
yjm1311	0
yjm1326	0
yjm1332	C->T
yjm1336	C->T
yjm1338	C->T
yjm1341	C->T
yjm1342	0
yjm1355	0
yjm1356	C->T
yjm1381	0
yjm1383	0
yjm1385	0
yjm1386	0
yjm1387	0
yjm1388	0
yjm1389	0
yjm1399	C->T
yjm1400	0
yjm1401	0
yjm1402	0
yjm1415	0
yjm1417	C->T
yjm1418	0
yjm1419	0
yjm1433	C->T
yjm1434	0
yjm1439	0
yjm1443	0
yjm1444	0
yjm1447	0
yjm1450	0
yjm1460	0
yjm1463	0
yjm1477	C->T
yjm1478	0
yjm1479	0
yjm1526	0
yjm1527	0
yjm1549	0
yjm1573	0
yjm1574	C->T
yjm1592	0
yjm1615	0
yjm189	C->T
yjm193	C->T
yjm195	0
yjm244	0
yjm248	0
yjm270	0
yjm271	C->T
yjm320	0
yjm326	0
yjm428	C->T
yjm450	0
yjm451	0
yjm453	C->T
yjm456	0
yjm470	0
yjm541	0
yjm554	0
yjm555	0
yjm627	0
yjm681	0
yjm682	0
yjm683	0
yjm689	0
yjm693	0
yjm969	C->T
yjm972	C->T
yjm975	C->T
yjm978	C->T
yjm981	C->T
yjm984	C->T
yjm987	C->T
yjm990	C->T
yjm993	C->T
yjm996	C->T
SK1	0
YJM789	0

## Sheet: rpm1(11)
Position	117	126	169	189	311	315	327	375	380	387	483
yjm1078	1 Del	G -> A	0	T -> A	C -> A	0	0	0	0	0	0
yjm1083	1 Del	0	6 Ins	0	0	2 Del	A -> C	0	0	0	0
yjm1129	1 Del	G -> A	0	T -> A	C -> A	0	0	0	0	0	0
yjm1133	0	0	0	0	0	0	0	0	0	91 Del	0
yjm1190	1 Del	0	6 Ins	0	0	2 Del	A -> C	0	0	0	0
yjm1199	1 Del	0	6 Ins	0	0	2 Del	A -> C	0	0	0	0
yjm1202	1 Del	0	6 Ins	0	0	2 Del	A -> C	0	0	0	0
yjm1208	1 Del	G -> A	0	0	0	2 Del	A -> C	T -> A	0	0	0
yjm1242	0	0	0	0	0	0	0	0	0	91 Del	0
yjm1244	1 Del	G -> A	0	T -> A	C -> A	0	0	0	0	0	0
yjm1248	1 Del	G -> A	0	0	0	0	0	0	0	91 Del	0
yjm1250	1 Del	0	6 Ins	0	0	0	0	0	0	91 Del	0
yjm1252	0	0	0	0	0	0	0	0	0	91 Del	0
yjm1273	1 Del	0	6 Ins	0	0	0	0	0	0	91 Del	0
yjm1304	1 Del	G -> A	6 Ins	0	0	2 Del	A -> C	0	0	0	1 Del
yjm1307	0	0	0	0	0	0	0	0	0	0	0
yjm1311	1 Del	G -> A	0	0	0	0	0	0	0	91 Del	0
yjm1326	1 Del	G -> A	6 Ins	0	0	2 Del	A -> C	0	0	0	1 Del
yjm1332	1 Del	G -> A	0	T -> A	C -> A	0	0	0	0	0	0
yjm1336	1 Del	G -> A	0	T -> A	C -> A	0	0	0	0	0	0
yjm1338	0	0	0	0	0	0	0	0	0	91 Del	0
yjm1341	1 Del	G -> A	0	T -> A	C -> A	0	0	0	0	0	0
yjm1342	1 Del	G -> A	6 Ins	0	0	0	0	0	0	91 Del	0
yjm1355	1 Del	G -> A	0	0	0	2 Del	A -> C	0	0	0	0
yjm1356	0	0	0	0	0	0	0	0	0	91 Del	0
yjm1381	1 Del	0	6 Ins	0	C -> A	0	0	T -> A	0	0	0
yjm1383	1 Del	G -> A	0	0	0	2 Del	0	0	57 Del	0	0
yjm1385	1 Del	G -> A	0	0	0	2 Del	0	0	57 Del	0	0
yjm1386	1 Del	G -> A	6 Ins	0	0	2 Del	A -> C	0	0	0	0
yjm1387	1 Del	G -> A	6 Ins	0	0	2 Del	A -> C	T -> A	0	0	1 Del
yjm1388	1 Del	G -> A	0	0	0	2 Del	0	0	57 Del	0	0
yjm1389	1 Del	G -> A	0	0	0	2 Del	0	0	57 Del	0	0
yjm1399	0	G -> A	0	0	0	0	0	0	0	0	0
yjm1400	1 Del	G -> A	6 Ins	0	0	0	0	0	0	91 Del	0
yjm1401	1 Del	G -> A	6 Ins	0	0	0	0	0	0	91 Del	0
yjm1402	1 Del	G -> A	6 Ins	0	0	0	0	0	0	91 Del	1 Del
yjm1415	0	0	0	0	0	0	0	0	0	91 Del	0
yjm1417	1 Del	G -> A	0	T -> A	C -> A	0	0	0	0	0	0
yjm1418	1 Del	G -> A	6 Ins	0	0	0	0	0	0	91 Del	0
yjm1419	1 Del	G -> A	0	0	0	0	0	0	0	91 Del	1 Del
yjm1433	0	0	6 Ins	0	C -> A	0	0	0	0	0	0
yjm1434	1 Del	0	6 Ins	0	0	0	0	0	0	91 Del	0
yjm1439	1 Del	G -> A	0	0	0	0	0	0	0	91 Del	0
yjm1443	1 Del	0	6 Ins	0	0	2 Del	A -> C	0	0	0	0
yjm1444	1 Del	G -> A	0	0	0	0	0	0	0	91 Del	0
yjm1447	1 Del	G -> A	6 Ins	0	0	2 Del	0	0	0	0	0
yjm1450	1 Del	G -> A	6 Ins	0	0	2 Del	A -> C	0	0	0	1 Del
yjm1460	1 Del	G -> A	0	0	0	2 Del	0	0	57 Del	0	0
yjm1463	0	0	6 Ins	0	0	0	0	0	0	0	0
yjm1477	0	0	0	0	0	0	0	0	0	91 Del	0
yjm1478	0	0	0	0	0	0	0	0	0	0	0
yjm1479	1 Del	G -> A	6 Ins	0	0	0	0	0	0	91 Del	0
yjm1526	1 Del	G -> A	0	T -> A	C -> A	0	0	0	0	0	0
yjm1527	1 Del	G -> A	0	0	0	0	0	0	0	91 Del	0
yjm1549	1 Del	G -> A	0	0	0	2 Del	A -> C	0	0	0	0
yjm1573	1 Del	G -> A	6 Ins	0	0	0	0	0	0	91 Del	1 Del
yjm1574	1 Del	G -> A	0	T -> A	C -> A	0	0	0	0	0	0
yjm1592	1 Del	G -> A	0	0	0	2 Del	0	0	57 Del	0	0
yjm1615	1 Del	G -> A	0	0	0	2 Del	A -> C	T -> A	0	0	0
yjm189	0	0	6 Ins	0	C -> A	0	0	0	0	0	0
yjm193	0	0	0	0	0	0	0	0	0	91 Del	0
yjm195	1 Del	0	6 Ins	0	0	0	0	0	0	0	0
yjm244	0	0	0	0	0	0	0	0	0	91 Del	0
yjm248	0	0	6 Ins	0	0	0	0	0	0	91 Del	0
yjm270	1 Del	G -> A	0	T -> A	C -> A	0	0	0	0	0	0
yjm271	0	0	0	0	0	0	0	0	0	91 Del	0
yjm320	1 Del	G -> A	6 Ins	0	0	2 Del	A -> C	0	0	0	1 Del
yjm326	0	0	0	0	0	2 Del	A -> C	0	0	0	0
yjm428	1 Del	G -> A	0	T -> A	C -> A	0	0	0	0	0	0
yjm450	1 Del	G -> A	6 Ins	0	0	2 Del	A -> C	0	0	0	1 Del
yjm451	1 Del	G -> A	0	0	0	0	0	0	0	91 Del	0
yjm453	0	0	6 Ins	0	0	0	0	0	0	0	0
yjm456	1 Del	G -> A	6 Ins	0	0	0	0	0	0	91 Del	1 Del
yjm470	1 Del	0	6 Ins	0	0	2 Del	A -> C	T -> A	0	0	0
yjm541	1 Del	G -> A	6 Ins	0	0	2 Del	A -> C	0	0	0	1 Del
yjm554	1 Del	G -> A	6 Ins	0	0	2 Del	A -> C	0	0	0	1 Del
yjm555	1 Del	G -> A	6 Ins	0	0	0	0	0	0	91 Del	1 Del
yjm627	1 Del	G -> A	0	0	0	0	0	0	0	91 Del	0
yjm681	1 Del	G -> A	0	0	0	2 Del	A -> C	0	0	0	0
yjm682	0	0	0	0	0	2 Del	A -> C	0	0	0	0
yjm683	0	0	0	0	0	2 Del	A -> C	0	0	0	0
yjm689	1 Del	0	6 Ins	0	0	2 Del	A -> C	0	0	0	0
yjm693	1 Del	0	6 Ins	0	0	2 Del	A -> C	0	0	0	0
yjm969	1 Del	G -> A	0	T -> A	C -> A	0	0	0	0	0	0
yjm972	1 Del	G -> A	0	T -> A	C -> A	0	0	0	0	0	0
yjm975	1 Del	G -> A	0	T -> A	C -> A	0	0	0	0	0	0
yjm978	1 Del	G -> A	0	T -> A	C -> A	0	0	0	0	0	0
yjm981	1 Del	G -> A	0	T -> A	C -> A	0	0	0	0	0	0
yjm984	1 Del	G -> A	0	T -> A	C -> A	0	0	0	0	0	0
yjm987	1 Del	G -> A	0	T -> A	C -> A	0	0	0	0	0	0
yjm990	1 Del	G -> A	0	T -> A	C -> A	0	0	0	0	0	0
yjm993	1 Del	G -> A	0	T -> A	C -> A	0	0	0	0	0	0
yjm996	1 Del	G -> A	0	T -> A	C -> A	0	0	0	0	0	0
SK1	1 Del	0	6 Ins	0	0	0	0	0	0	0	0
YJM789	1 Del	G -> A	6 Ins	0	0	2 Del	A -> C	0	0	0	0

## Sheet: var1(5)
Strain	Pos:64	Pos:236	Pos:392	Pos:854	Pos:880
yjm1078	0	48 Del	0	0	0
yjm1083	0	0	0	0	0
yjm1129	0	48 Del	0	0	0
yjm1133	0	0	0	0	A->T(N)
yjm1190	3 Del	0	0	0	0
yjm1199	0	48 Del	0	0	0
yjm1202	0	48 Del	0	0	0
yjm1208	0	0	0	0	0
yjm1242	0	48 Del	0	0	0
yjm1244	0	48 Del	0	0	0
yjm1248	0	48 Del	0	T->A(N)	0
yjm1250	0	48 Del	48 Ins	0	0
yjm1252	0	48 Del	0	T->A(N)	0
yjm1273	3 Del	48 Del	0	0	0
yjm1304	3 Del	0	0	0	0
yjm1307	0	0	0	0	0
yjm1311	0	48 Del	0	0	0
yjm1326	3 Del	48 Del	0	0	0
yjm1332	0	0	0	0	0
yjm1336	0	48 Del	0	0	0
yjm1338	0	48 Del	0	0	A->T(N)
yjm1341	0	48 Del	0	0	A->T(N)
yjm1342	0	48 Del	0	0	0
yjm1355	0	0	0	0	0
yjm1356	0	48 Del	0	0	A->T(N)
yjm1381	0	0	0	0	0
yjm1383	0	0	0	0	0
yjm1385	0	0	48 Ins	0	A->T(N)
yjm1386	0	0	0	0	0
yjm1387	0	48 Del	0	T->A(N)	0
yjm1388	0	0	0	0	0
yjm1389	0	0	0	0	0
yjm1399	0	48 Del	0	T->A(N)	0
yjm1400	0	48 Del	48 Ins	0	0
yjm1401	0	48 Del	0	0	0
yjm1402	0	48 Del	0	0	0
yjm1415	0	48 Del	0	0	0
yjm1417	0	48 Del	0	0	A->T(N)
yjm1418	0	48 Del	0	T->A(N)	0
yjm1419	0	0	0	0	0
yjm1433	0	48 Del	0	0	0
yjm1434	3 Del	48 Del	0	0	0
yjm1439	0	48 Del	0	T->A(N)	0
yjm1443	3 Del	48 Del	0	0	0
yjm1444	0	0	0	0	0
yjm1447	0	48 Del	0	0	0
yjm1450	0	48 Del	0	0	0
yjm1460	0	0	0	0	0
yjm1463	0	48 Del	0	0	A->T(N)
yjm1477	0	48 Del	0	0	0
yjm1478	0	48 Del	0	0	A->T(N)
yjm1479	0	48 Del	48 Ins	0	0
yjm1526	0	48 Del	0	0	0
yjm1527	0	48 Del	0	0	0
yjm1549	0	48 Del	48 Ins	0	0
yjm1573	0	48 Del	0	0	0
yjm1574	0	48 Del	0	0	0
yjm1592	0	0	0	0	0
yjm1615	0	0	0	0	0
yjm189	0	48 Del	0	0	0
yjm193	0	48 Del	0	0	0
yjm195	0	48 Del	0	T->A(N)	0
yjm244	0	48 Del	0	0	A->T(N)
yjm248	0	48 Del	0	T->A(N)	0
yjm270	0	48 Del	0	0	0
yjm271	0	48 Del	0	0	0
yjm320	0	0	0	0	A->T(N)
yjm326	0	0	0	0	0
yjm428	0	48 Del	0	0	0
yjm450	0	0	0	0	A->T(N)
yjm451	0	0	0	0	0
yjm453	0	48 Del	0	0	0
yjm456	3 Del	48 Del	0	0	0
yjm470	0	0	0	0	0
yjm541	0	0	0	0	A->T(N)
yjm554	0	0	0	0	A->T(N)
yjm555	3 Del	48 Del	0	0	0
yjm627	0	48 Del	0	T->A(N)	0
yjm681	0	48 Del	0	0	0
yjm682	0	0	0	0	0
yjm683	0	0	0	0	0
yjm689	0	0	0	0	0
yjm693	0	0	0	0	0
yjm969	0	48 Del	0	0	0
yjm972	0	48 Del	0	0	0
yjm975	0	48 Del	0	0	0
yjm978	0	48 Del	0	0	0
yjm981	0	48 Del	0	0	0
yjm984	0	48 Del	0	0	0
yjm987	0	48 Del	0	0	0
yjm990	0	48 Del	0	0	0
yjm993	0	48 Del	0	0	0
yjm996	0	48 Del	0	0	0
SK1	0	48 Del	0	T->A(N)	0
YJM789_mito	3 Del	48 Del	0	0	0

[truncated: 3 more sheets: cob(13), tRNA(1), introns_ENS2_SCE1(15)]
